*Supporting Information for*

**Comprehensive mass spectrometry-guided plant specialized metabolite phenotyping reveals metabolic diversity in the cosmopolitan plant family Rhamnaceae**

Kyo Bin Kang<sup>1,2,3,a,\*</sup>, Madeleine Ernst<sup>1,a</sup>, Justin J. J. van der Hooft<sup>1,4,a</sup>, Ricardo R. da Silva<sup>1</sup>, Junha Park<sup>3</sup>, Marnix H. Medema<sup>4</sup>, Sang Hyun Sung<sup>3,b</sup> and Pieter C. Dorrestein<sup>1,\*</sup>

<sup>1</sup> Collaborative Mass Spectrometry Innovation Center, Skaggs School of Pharmacy and Pharmaceutical Sciences, University of California, San Diego, La Jolla, California 92093, United States

<sup>2</sup> College of Pharmacy, Sookmyung Women's University, Seoul 04310, Republic of Korea

<sup>3</sup> College of Pharmacy and Research Institute of Pharmaceutical Sciences, Seoul National University, Seoul 08826, Republic of Korea

<sup>4</sup> Bioinformatics Group, Wageningen University, 6708PB Wageningen, The Netherlands

<sup>a</sup> K.B.K, M.E. and J.J.J.v.d.H contributed equally to this work.

<sup>b</sup> Deceased July 24, 2018.

\* correspondence: e-mail: [kbkang@sookmyung.ac.kr](mailto:kbkang@sookmyung.ac.kr) (K.B.K.) and [pdorrestein@ucsd.edu](mailto:pdorrestein@ucsd.edu) (P.C.D.)

### **Result S1. Inspection on putative annotation of molecular families C and E.**

Based on Mass2Motifs, two flavonoid aglycone substructures, quercetin and kaempferol, could be distinguished in **C**. Supplementary Figure 1(a) visualizes Mass2Motif-mapped molecular family **C**. Three Mass2Motifs 86, 130, and 149 were extracted from MS/MS spectra in **C**; these Mass2Motifs explained MS/MS features which are commonly observed in plant metabolomics dataset, so they could be easily annotated. Mass2Motif 130 was annotated as a kaempferol-related motif, while Mass2motif 86 as a quercetin-related motif. Mass2Motif 149 contained MS/MS fragments which are commonly observed in collision-induced dissociation (CID) fragmentation spectra of flavonol aglycones, such as quercetin or myricetin (Fabre *et al.*, 2001). As shown in Figure S1(a), spectral node in **C** could be grouped into two subfamilies regarding to their Mass2Motifs. Nodes with Mass2Motifs 130 were suggested to be 3-*O*-glycoside derivatives of kaempferol, while the others were annotated to be quercetin 3-*O*-glycosides. These annotations were supported by spectral library matching and the NAP *in silico* identification results, and confirmed by chromatographic validation for nodes **14** (nicotiflorin) and **15** (kaempferol 3-*O*-neohesperidoside) using reference standards (Figures S4 and S5). Flavonol 3-*O*-glycosides are commonly observed plant secondary metabolites, and the taxonomical mapping of cluster **C** corresponds to the universal distribution of this class of metabolites.

A 22 spectra containing molecular family **E** shows how NAP works in network clusters for which library matches are not present. In MetFrag *in silico* library matching for cluster **E**, some nodes were annotated as “unnatural” compounds; for example, the best MetFrag candidates for nodes **16** ( $m/z$  533.277) and **17** ( $m/z$  485.313) were synthetic compounds. However, consensus scoring perceived that most nodes in this cluster contain a similar chemical scaffold; so the candidates were re-ranked and we can see that the best candidates in final NAP result are compounds of similar structures (Figure S1(b)). This type of chemical scaffold, called

cyclopeptide alkaloid, is a subclass of plant cyclopeptides of which most derivatives have been mostly reported from Rhamnaceae species (Tuenter *et al.*, 2017a). The NAP identification for the node **18** ( $m/z$  499.329), adouetine X, was confirmed by chromatographic comparison with the previously purified compound (Figure S9); so chemical annotations for this cluster as cyclopeptide alkaloids were validated. One of remarkable points in this cluster was that some nodes were labeled with an orange color, which represents *Berchemia* species. There has not been any report of cyclopeptide alkaloids from this genus, but now our result suggests the presence of cyclopeptide alkaloids in *B. lineata*, a hardly investigated species for its metabolites. This suggests that MS/MS spectral network enhanced by the NAP can also be an efficient sample prioritization strategy for natural products discovery.

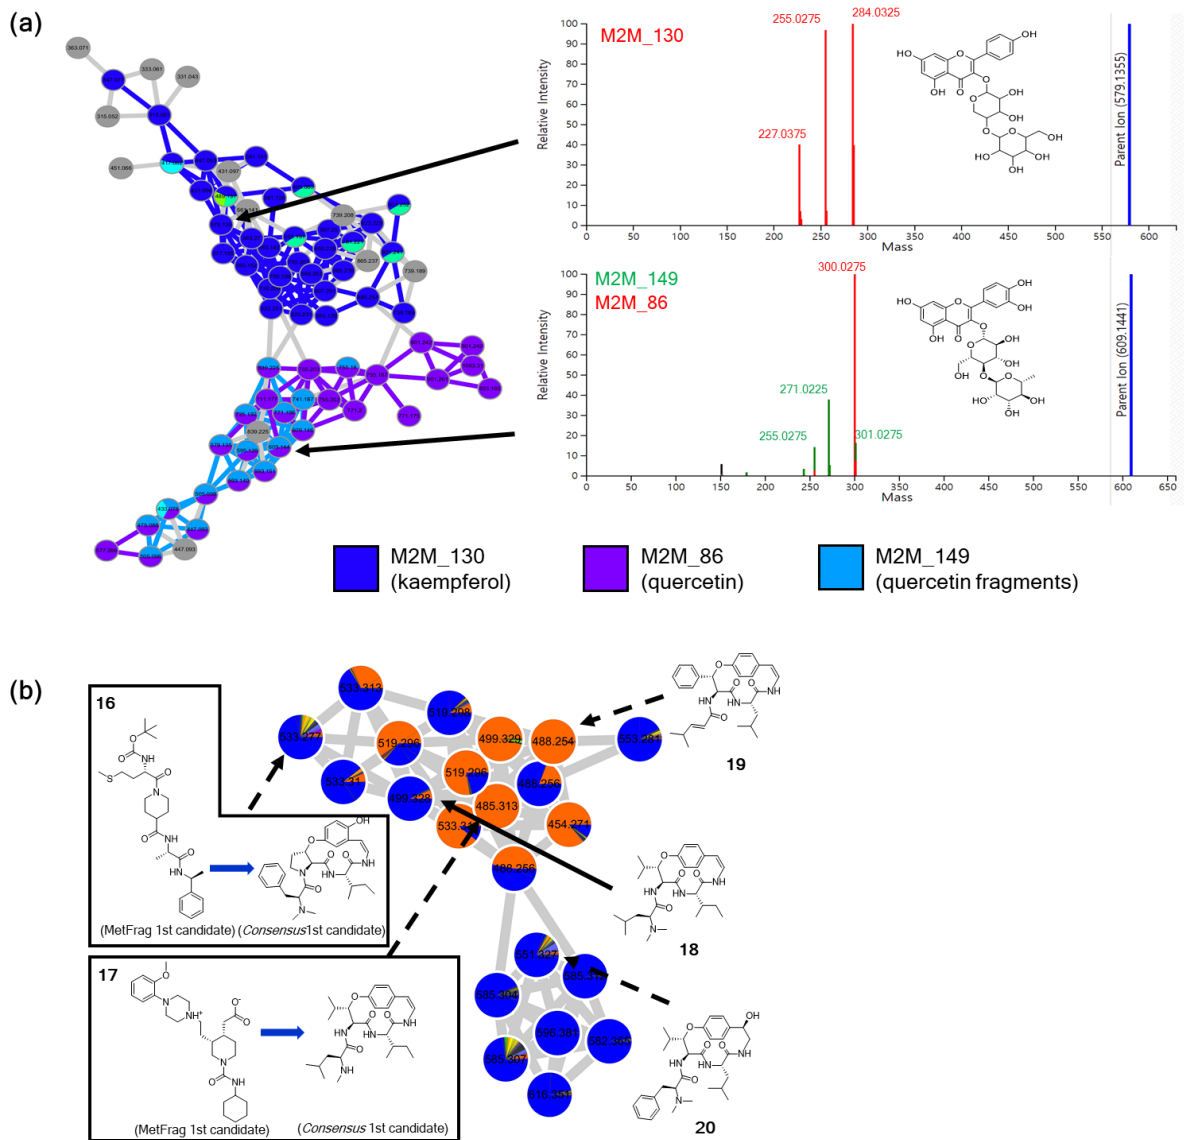

**Figure S1.** NAP/MS2LDA-driven metabolite annotation of (a) flavonol 3-*O*-glycosides (molecular family C) and (b) cyclopeptide alkaloids (molecular family E).

## Result S2. Validation of spectral identification using reference standards

Identifications were confirmed by comparing chromatographic  $t_R$  and MS/MS spectra as Figures S2–9. Reference standards were acquired as described below.

Emodin-8-*O*- $\beta$ -D-glucopyranoside (**9**): The reference standard was isolated and identified in our previous study (Kim *et al.*, 2009a). MS/MS spectrum is deposited in the GNPS spectral library,

<https://gnps.ucsd.edu/ProteoSAFe/gnpslibraryspectrum.jsp?SpectrumID=CCMSLIB00004679279#%7B%7D>.

3-*O*-Protocatechuoylceanothic acid 2-methyl ester (**10**): The reference standard was isolated and identified in our previous study (Kang *et al.*, 2016). MS/MS spectrum is deposited in the GNPS spectral library,

<https://gnps.ucsd.edu/ProteoSAFe/gnpslibraryspectrum.jsp?SpectrumID=CCMSLIB00004679282#%7B%7D>.

3-*O*-Vanilloylceanothic acid (**11**): The reference standard was isolated and identified in our previous study (Kang *et al.*, 2016). MS/MS spectrum is deposited in the GNPS spectral library,

<https://gnps.ucsd.edu/ProteoSAFe/gnpslibraryspectrum.jsp?SpectrumID=CCMSLIB00004679281#%7B%7D>.

3-*O*-Protocatechuoylceanothic acid (**12**): The reference standard was isolated and identified in our previous study (Kang *et al.*, 2016). MS/MS spectrum is deposited in the GNPS spectral library,

<https://gnps.ucsd.edu/ProteoSAFe/gnpslibraryspectrum.jsp?SpectrumID=CCMSLIB00004679284#%7B%7D>.

Nicotiflorin (**14**): The reference standard, which was isolated and identified by (Yoo *et al.*, 2015) was kindly provided by S. H. Kim (Yonsei University, Korea). MS/MS spectrum is deposited in the GNPS spectral library,

<https://gnps.ucsd.edu/ProteoSAFe/gnpslibraryspectrum.jsp?SpectrumID=CCMSLIB00004679287#%7B%7D>.

Quercetin 3-*O*-neohesperidoside (**15**): The reference standard was isolated and identified in our previous study (Sung, 1998; Kim *et al.*, 2009b). MS/MS spectrum is deposited in the GNPS spectral library,

<https://gnps.ucsd.edu/ProteoSAFe/gnpslibraryspectrum.jsp?SpectrumID=CCMSLIB00004679290#%7B%7D>.

Adouetine X (**18**): The reference standard was isolated and identified in our previous study (Tuenter *et al.*, 2017b). MS/MS spectrum is deposited in the GNPS spectral library,

<https://gnps.ucsd.edu/ProteoSAFe/gnpslibraryspectrum.jsp?SpectrumID=CCMSLIB00004679280#%7B%7D>.

Emodin (**21**): The reference standard was isolated and identified in our previous study (Kim *et al.*, 2009a). MS/MS spectrum is deposited in the GNPS spectral library,

<https://gnps.ucsd.edu/ProteoSAFe/gnpslibraryspectrum.jsp?SpectrumID=CCMSLIB00004679278#%7B%7D>.

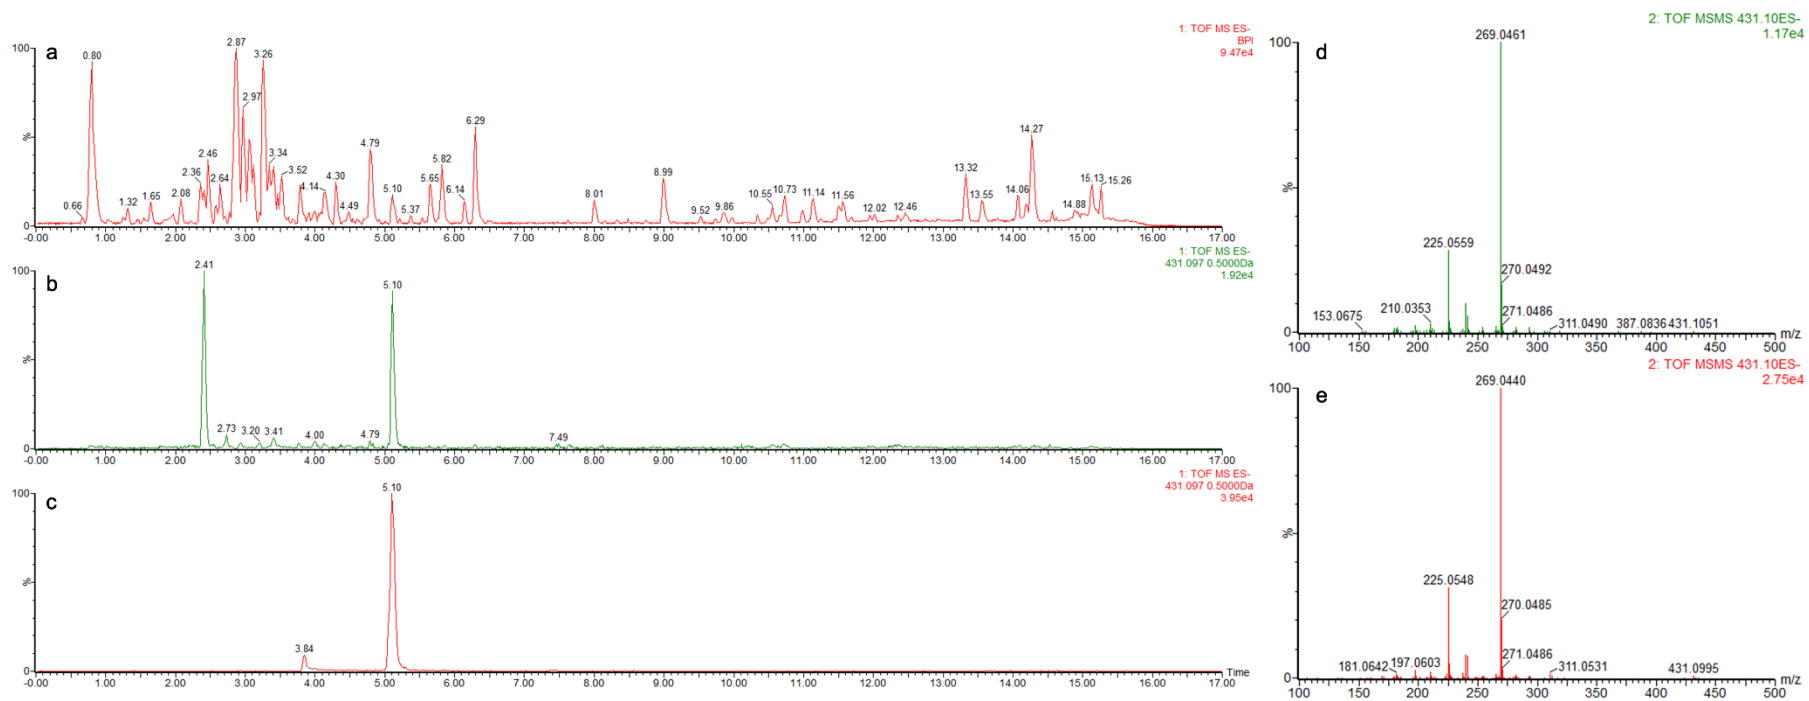

**Figure S2.** Chromatographic validation for emodin-8-*O*-β-D-glucopyranoside (**9**). BPI (**a**) and XIC (*m/z* 431.097, **b**) chromatograms of *Berchemia yunnanensis*, XIC (*m/z* 431.097, **c**) chromatogram of the reference standard, MS/MS spectra of emodin-8-*O*-β-D-glucopyranoside from *B. yunnanensis* (**d**) and the reference (**e**).

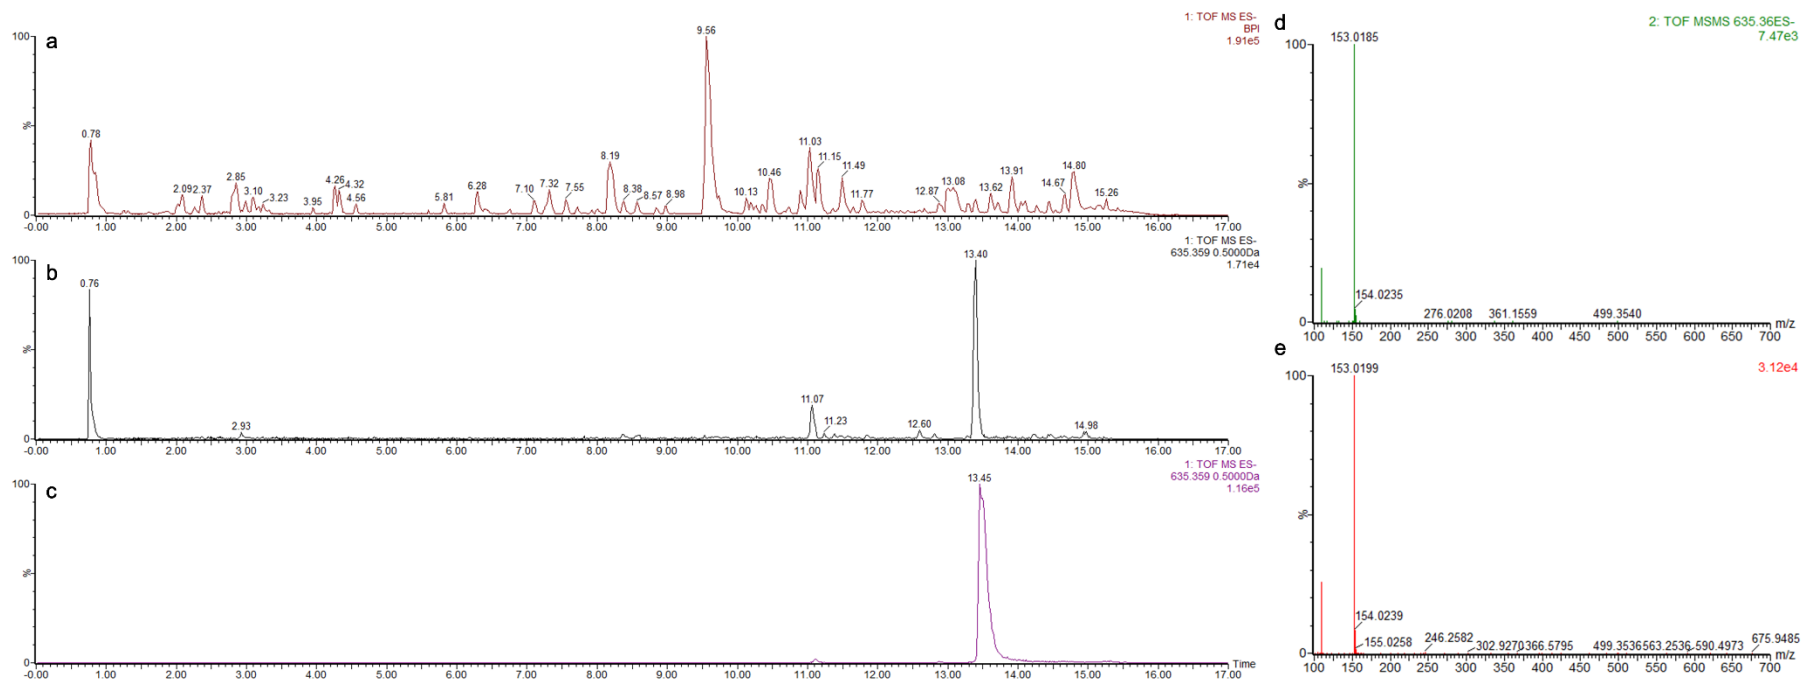

**Figure S3.** Chromatographic validation for 3-*O*-protocatechuoylceanothic acid 2-methyl ester (**10**). BPI (**a**) and XIC ( $m/z$  635.359, **b**) chromatograms of *Ziziphus apelata*, XIC ( $m/z$  635.359, **c**) chromatogram of the reference standard, MS/MS spectra of 3-*O*-protocatechuoylceanothic acid 2-methyl ester from *Z. apelata* (**d**) and the reference (**e**).



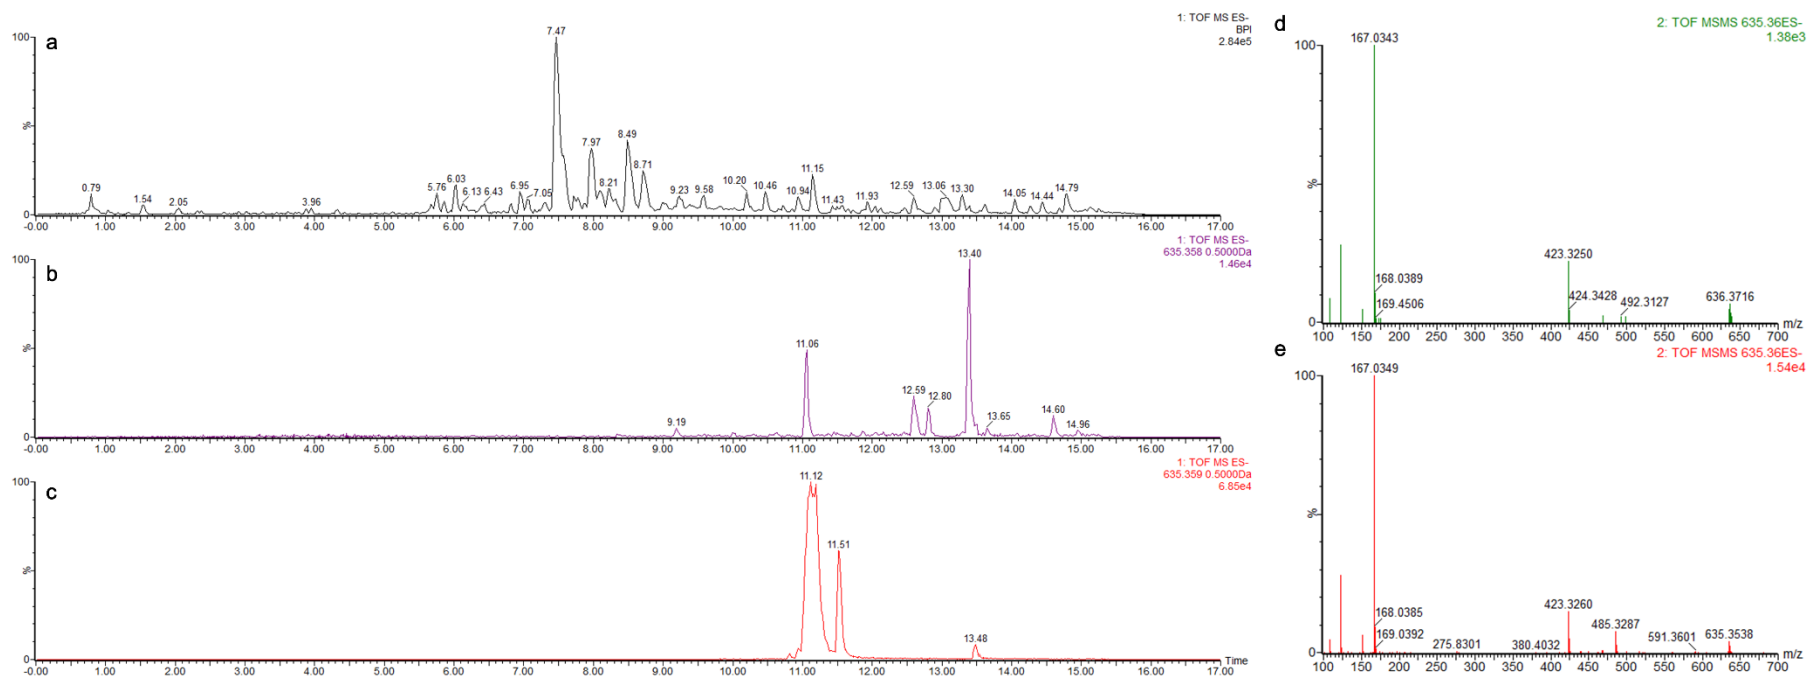

**Figure S4.** Chromatographic validation for 3-*O*-vanilloylceanothic acid (**11**). BPI (**a**) and XIC ( $m/z$  635.359, **b**) chromatograms of *Ziziphys guatemalensis*, XIC ( $m/z$  635.359, **c**) chromatogram of the reference standard, MS/MS spectra of 3-*O*-vanilloylceanothic acid from *Z. guatemalensis* (**d**) and the reference (**e**). The other peak at 13.40 min was identified as 3-*O*-vanilloylepiceanothic acid, an epimeric isomer (Kang *et al.*, 2016).

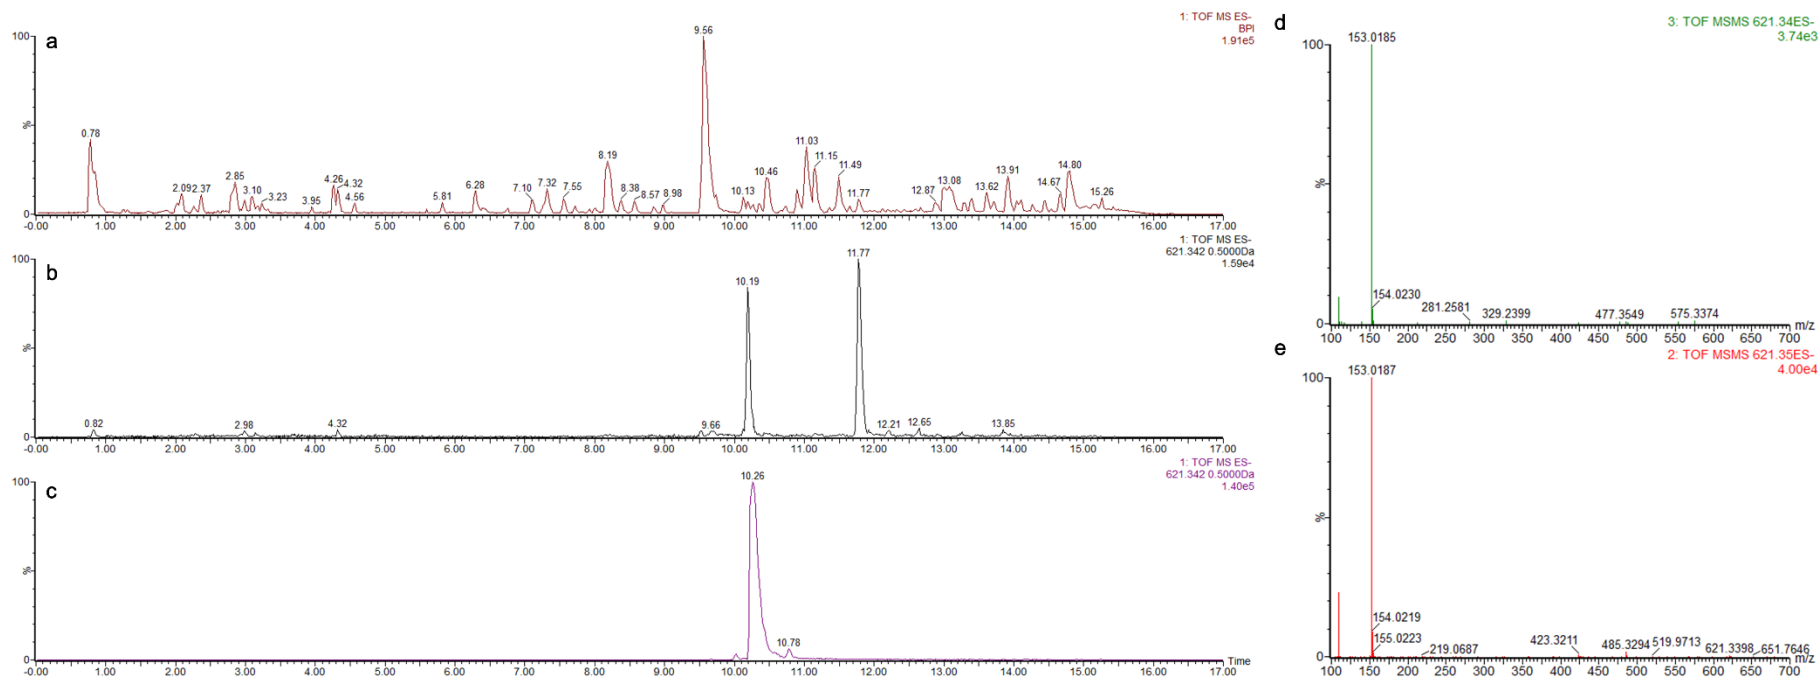

**Figure S5.** Chromatographic validation for 3-*O*-protocatechuoylceanothic acid (**12**). BPI (**a**) and XIC ( $m/z$  621.342, **b**) chromatograms of *Ziziphus apelata*, XIC ( $m/z$  621.342, **c**) chromatogram of the reference standard, MS/MS spectra of 3-*O*-protocatechuoylceanothic acid from *Z. apelata* (**d**) and the reference (**e**). The other peak at 11.77 min was identified as 2-*O*-vanilloylaliphitic acid (Kang *et al.*, 2016).

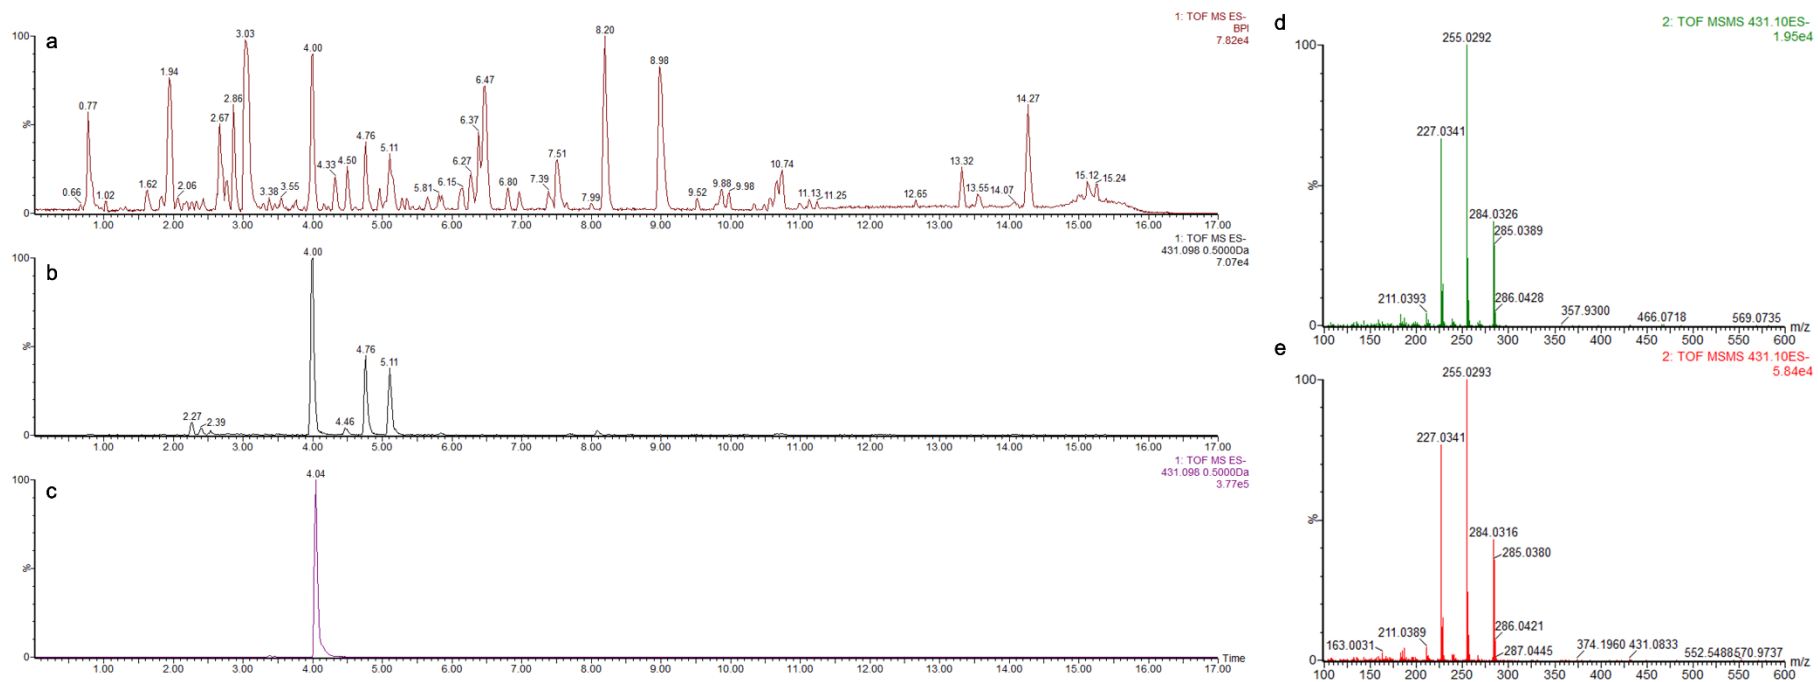

**Figure S6.** Chromatographic validation for nicotiflorin (**14**). BPI (**a**) and XIC ( $m/z$  593.151, **b**) chromatograms of *Berchemia lineata*, XIC ( $m/z$  593.151, **c**) chromatogram of the reference standard, MS/MS spectra of nicotiflorin from *B. lineata* (**d**) and the reference (**e**).

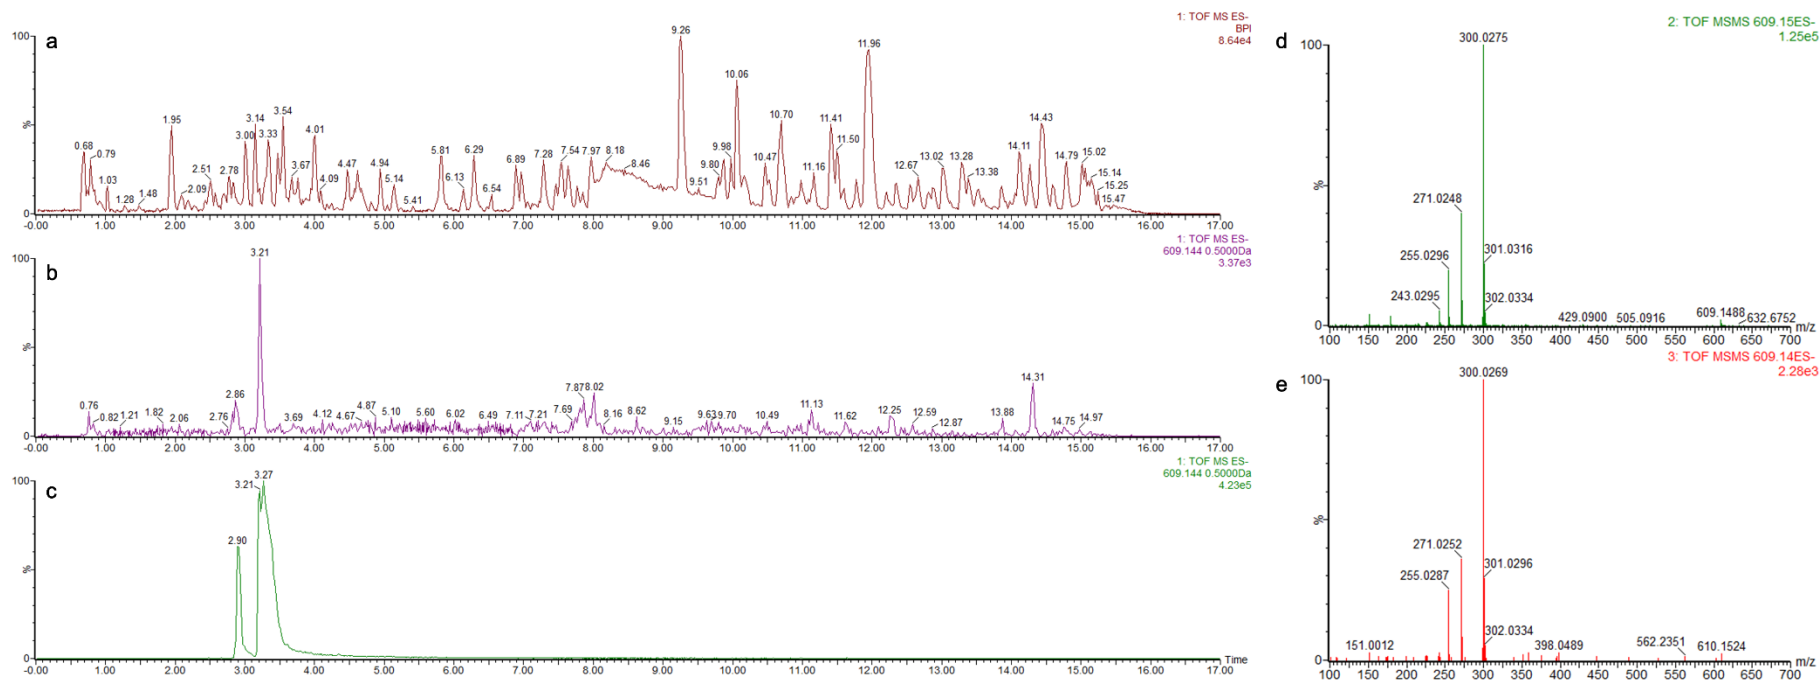

**Figure S7.** Chromatographic validation for quercetin 3-*O*-neohesperidoside (**15**). BPI (**a**) and XIC (*m/z* 609.144, **b**) chromatograms of *Ziziphys thrysiflora*, XIC (*m/z* 609.144, **c**) chromatogram of the reference standard, MS/MS spectra of quercetin 3-*O*-neohesperidoside from *Z. thrysiflora* (**d**) and the reference (**e**).

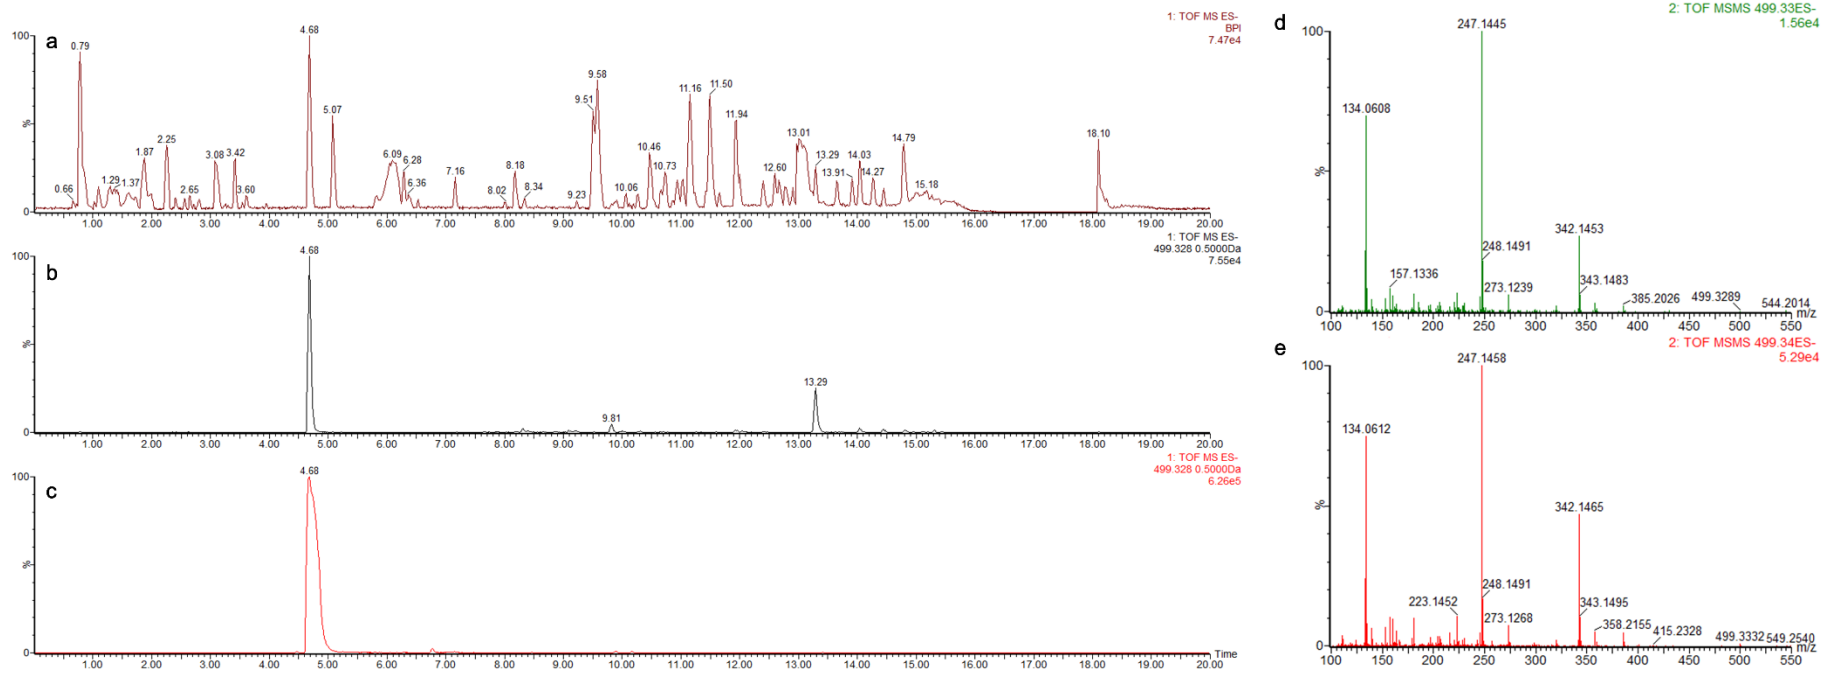

**Figure S8.** Chromatographic validation for adouetine X (18). BPI (a) and XIC ( $m/z$  499.328, b) chromatograms of *Ziziphus incurva*, XIC ( $m/z$  499.328, c) chromatogram of the reference standard, MS/MS spectra of adouetine X from *Z. incurva* (d) and the reference (e).

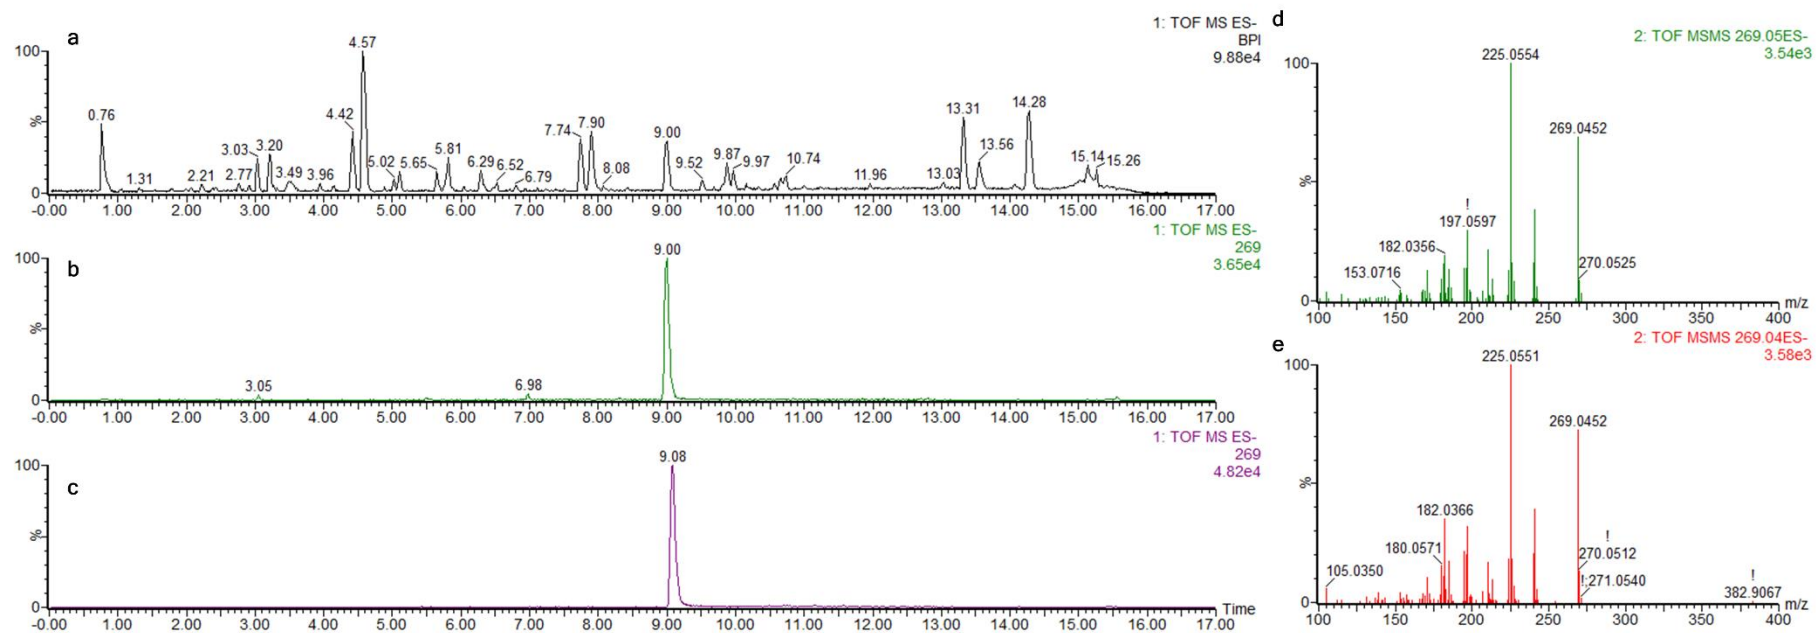

**Figure S9.** Chromatographic validation for emodin (**21**). BPI (**a**) and XIC ( $m/z$  269.043, **b**) chromatograms of *Rhamnus oreodendron*, XIC ( $m/z$  269.043, **c**) chromatogram of the reference standard, MS/MS spectra of emodin from *R. oreodendron* (**d**) and the reference (**e**).

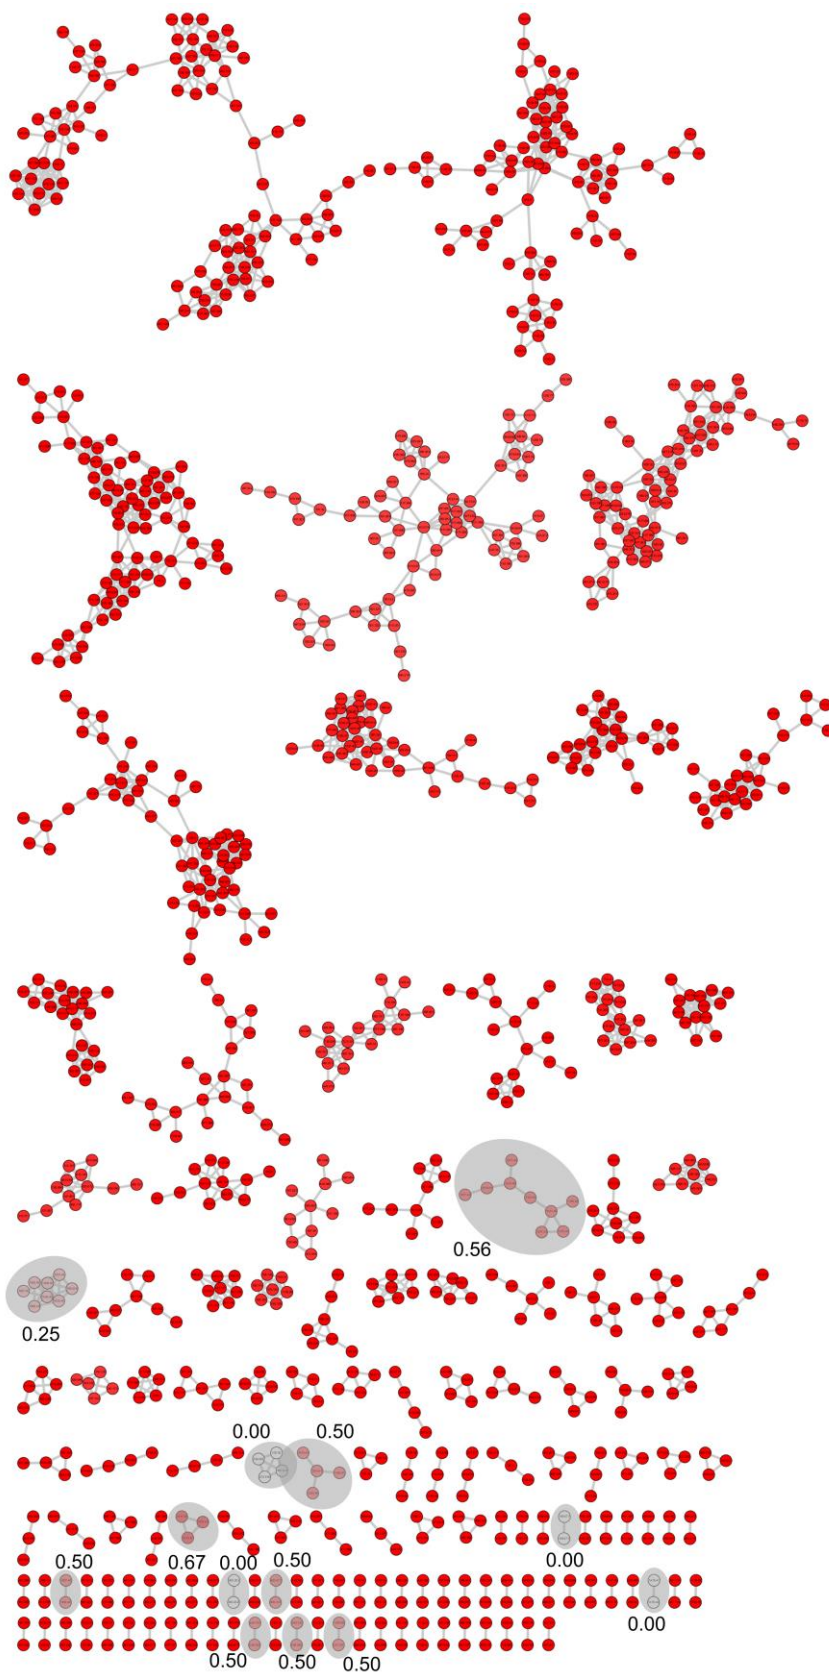

**Figure S10.** ClassyFire consistency scores for the Rhamnaceae molecular network. Molecular families with scores  $< 0.70$  were marked with their scores.

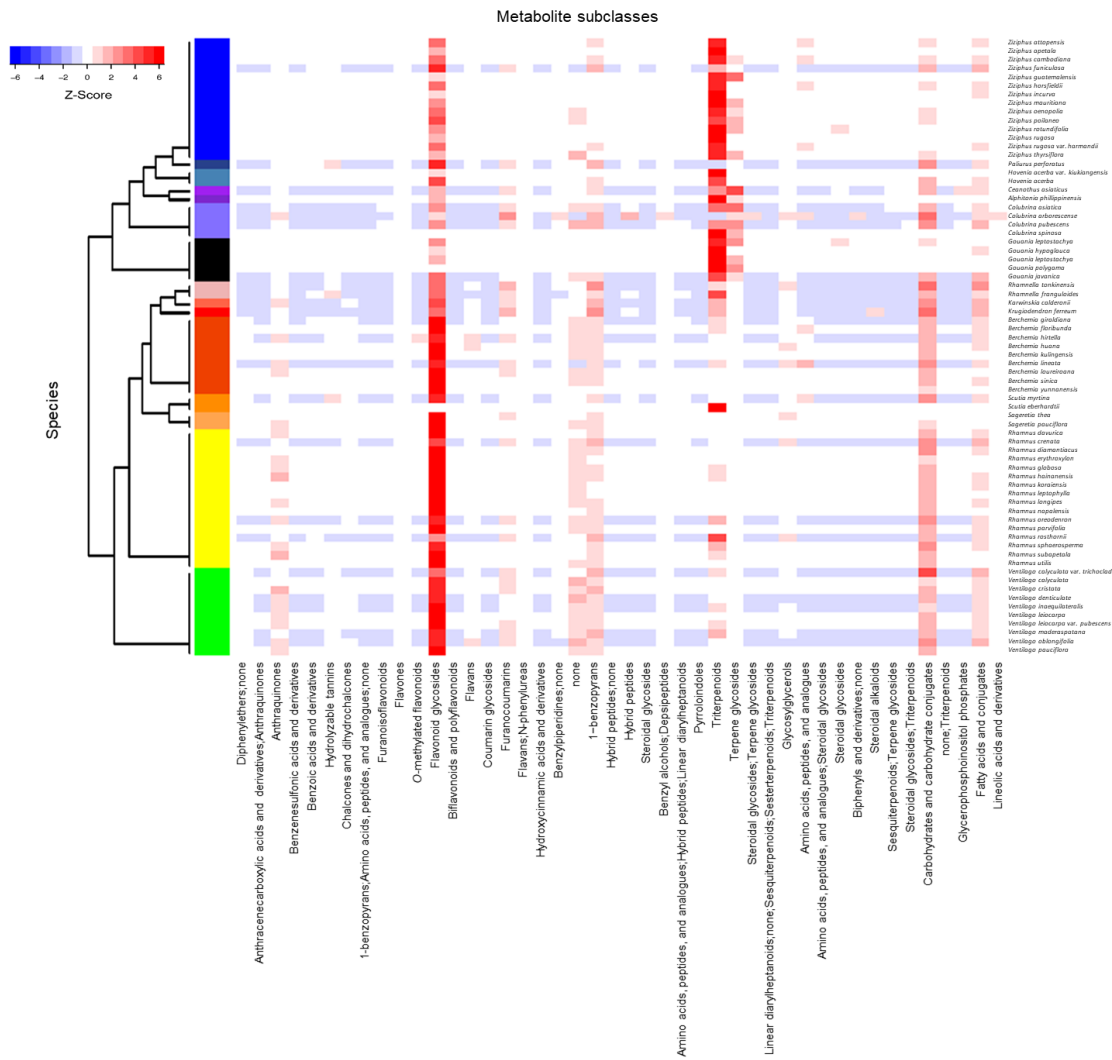

**Figure S11.** The complete chemical subclass distribution heatmap.



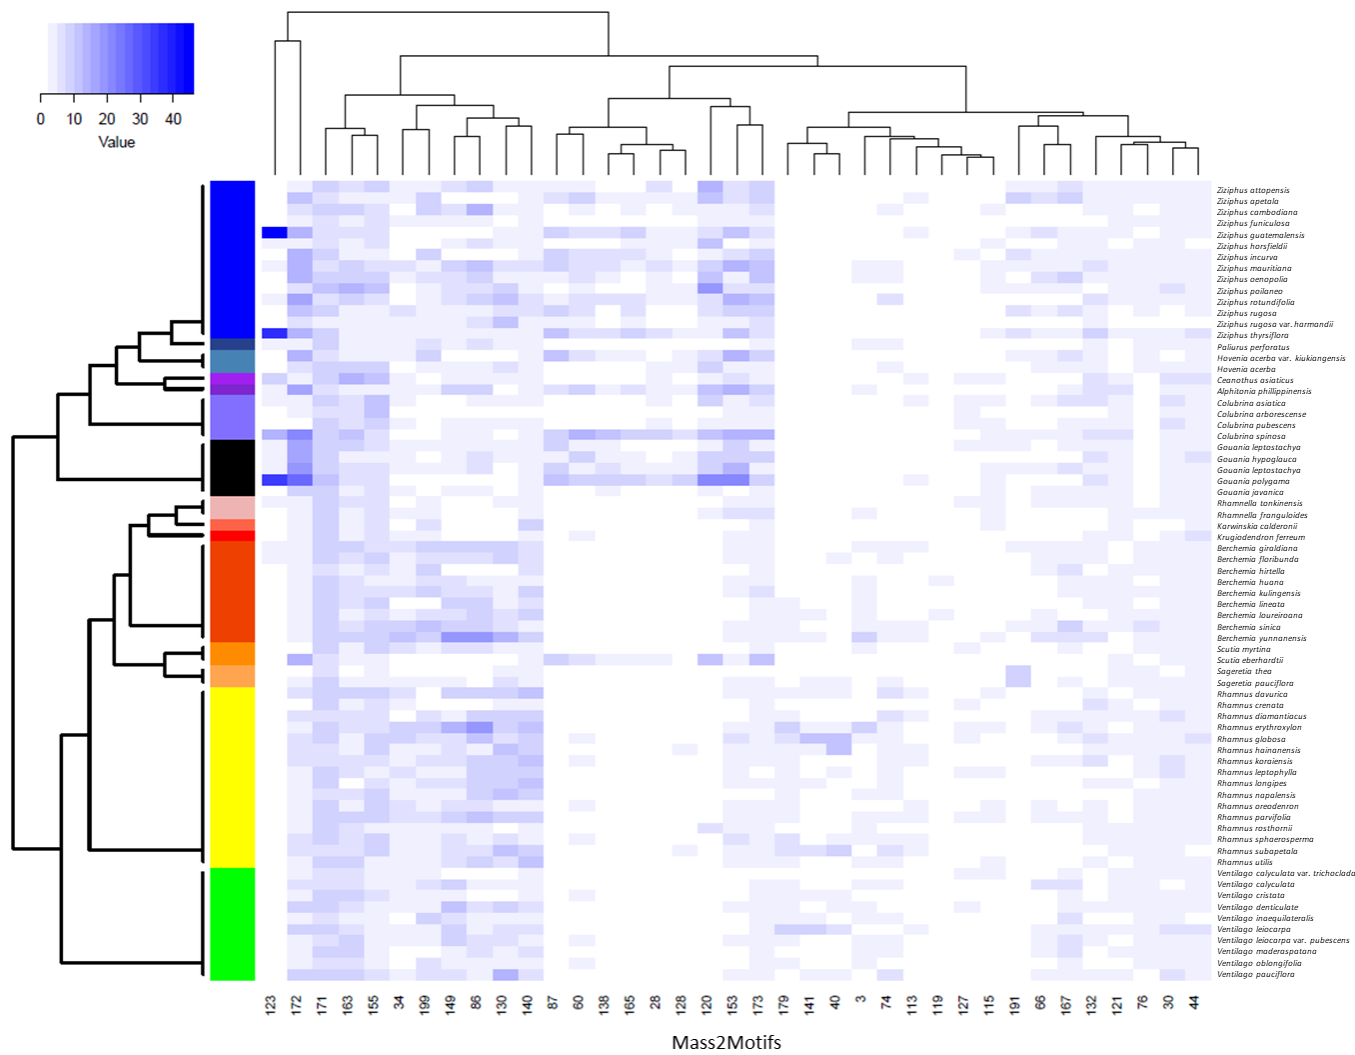

**Figure S12.** The complete Mass2Motif distribution heatmap.

**Table S1.** Detailed information about Rhamnaceae plant samples.

| No.             | Scientific names                                                                                   | Voucher No.  | Extract Code | Extraction solvent | Collection |                                                                    |
|-----------------|----------------------------------------------------------------------------------------------------|--------------|--------------|--------------------|------------|--------------------------------------------------------------------|
|                 |                                                                                                    |              |              |                    | Date       | Site                                                               |
| 1               | <i>Alphitonia philippinensis</i> Braid                                                             | #N/A         | FBM072-017   | MeOH               | #N/A       | Vietnam                                                            |
| 2               | <i>Berchemia floribunda</i> (Wall.) Brongn.                                                        | KRIB 0027008 | FBM073-082   | MeOH               | 2009-03-31 | Kon Tum prov., Dak Glei distr., Muong Hoong comm., Vietnam         |
| 3               | <i>Berchemia giraldiana</i> C.K. Schneid.                                                          | KRIB 0041278 | FBM151-052   | MeOH               | 2012-03-20 | Lam Dong prov., Lac Duong distr., Lat comm., Vietnam               |
| 4               | <i>Berchemia hirtella</i> Tsai & K.M. Feng                                                         | KRIB 0063332 | FBM021-009   | 95% EtOH           | 2006-08-30 | Mengla, Menghai, Yunnan Prov., China                               |
| 5               | <i>Berchemia huana</i> Rehder                                                                      | #N/A         | FBM085-005   | 95% EtOH           | #N/A       | China                                                              |
| 6               | <i>Berchemia kulingensis</i> Schneid.                                                              | KRIB 0054196 | FBM217-027   | MeOH               | 2014-05-20 | Xiping, Jinggangshan, Jiangxi Province, China                      |
| 7               | <i>Berchemia lineata</i> (L.) DC.                                                                  | KRIB 0042028 | FBM150-010   | 95% EtOH           | 2012-05-25 | Zhaoqing, Guangdong Prov., China                                   |
| 8               | <i>Berchemia loureiroana</i> DC.                                                                   | KRIB 0016870 | FBM032-033   | MeOH               | 2007-12-01 | Lang Son, Huu Lien Reserve, Vietnam                                |
| 9               | <i>Berchemia sinica</i> C. K. Schneid.                                                             | KRIB 0042529 | FBM166-058   | MeOH               | #N/A       | Gansu Province, China                                              |
| 10              | <i>Berchemia yunnanensis</i> Franch.                                                               | KRIB 0061158 | FBM059-037   | 95% EtOH           | #N/A       | Luquan, Yunnan Prov., China                                        |
| 11              | <i>Ceanothus asiaticus</i> L.                                                                      | KRIB 0041714 | FBM151-028   | MeOH               | 2012-04-08 | Phu Yen prov., Song Cau distr., Xuan Loc comm., Vietnam            |
| 12              | <i>Colubrina arborescens</i> (Mill.) Sarg.                                                         | KRIB 0063798 | FBM123-083   | 95% EtOH           | #N/A       | Yunnan Prov., China                                                |
| 13              | <i>Colubrina asiatica</i> (L.) Brongn.                                                             | KRIB 0035940 | FBM122-078   | MeOH               | 2011-01-08 | An Giang prov., Tinh Bien distr., An Hao comm., Vietnam            |
| 14              | <i>Colubrina pubescens</i> Kurz.                                                                   | KRIB 0045827 | FBM169-088   | MeOH               | 2012-09-12 | Ban Veun Village, Moun District, Champasak Province, Laos          |
| 15              | <i>Colubrina spinosa</i> Donn. Sm.                                                                 | KRIB 0019866 | FBM040-072   | 95% EtOH           | 2008-03-11 | Costa Rica                                                         |
| 16              | <i>Gouania javanica</i> Miq.                                                                       | KRIB 0036193 | FBM126-044   | MeOH               | 2011-01-23 | Binh Phuoc prov., Phuoc Long distr., Son Giang comm., Vietnam      |
| 17 <sup>a</sup> | <i>Gouania leptostachya</i> DC.                                                                    | KRIB 0012626 | FBM018-045   | MeOH               | 2007-04-07 | Ngoc Thanh, Me Linh district, Vinh Phuc province, Vietnam          |
|                 |                                                                                                    | KRIB 0062079 | FBM085-041   | 95% EtOH           | #N/A       | Mengla, Yunnan Prov., China                                        |
| 18              | <i>Gouania hypoglauca</i> Standl.                                                                  | KRIB 0042922 | FBM154-017   | 95% EtOH           | 2012-08-10 | Guanacaste, Guanacaste National Park, Costa Rica                   |
| 19              | <i>Gouania polygama</i> (Jacq.) Urb.                                                               | KRIB 0032495 | FBM096-071   | 95% EtOH           | #N/A       | Guanacaste, Guanacaste National Park, Costa Rica                   |
| 20              | <i>Hovenia acerba</i> Lindl.                                                                       | KRIB 0050080 | FBM183-079   | MeOH               | 2012-09-30 | Zheshang Park, Wuhu City, Anhui Province, China                    |
| 21              | <i>Hovenia acerba</i> var. <i>kiukiangensis</i> (Hu & W.C. Cheng) C.Y. Wu ex Y.L. Chen & P.K. Chou | KRIB 0064069 | FBM006-040   | 95% EtOH           | 2005-07-12 | Mengla, Jinghong, Yunnan Prov., China                              |
| 22              | <i>Karwinskia calderonii</i> Standl.                                                               | KRIB 0056245 | FBM213-017   | 95% EtOH           | 2014-02-21 | Guanacaste Conservation Area, Santa Rosa National Park, Costa Rica |

|    |                                                     |              |            |          |            |                                                                                                        |
|----|-----------------------------------------------------|--------------|------------|----------|------------|--------------------------------------------------------------------------------------------------------|
| 23 | <i>Krugiodendron ferreum</i> (Vahl) Urb.            | KRIB 0043036 | FBM158-013 | 95% EtOH | 2012-03-16 | Guanacaste Conservation Area, Santa Rosa National Park, Costa Rica                                     |
| 24 | <i>Paliurus perforatus</i> Blanco                   | KRIB 0041920 | FBM153-046 | MeOH     | 2009-03-03 | Khanh Hoa province, Hon Ba Natural Reserve, Vietnam                                                    |
| 25 | <i>Rhamnella franguloides</i> (Maxim.) Weberb.      | KRIB 0050128 | FBM189-042 | MeOH     | 2013-06-02 | Dongdianhoucun, Longquanzhen, Kunyuqu, Yantai City, Shandong Province, China                           |
| 26 | <i>Rhamnella tonkinensis</i> (Pit.) T.Yamaz.        | KRIB 0038948 | FBM139-020 | MeOH     | 2011-08-16 | Gia Lai prov., Kbang distr., So Pai comm., Vietnam                                                     |
| 27 | <i>Rhamnus crenata</i> Siebold & Zucc.              | #N/A         | FBM010-079 | MeOH     | #N/A       | China                                                                                                  |
| 28 | <i>Rhamnus davurica</i> Pall.                       | KRIB 0037275 | FBM136-009 | 95% EtOH | 2011-06-29 | Sandao, Yanji, Jilin Prov., China                                                                      |
| 29 | <i>Rhamnus diamantiaca</i> Nakai                    | KRIB 0050134 | FBM186-021 | MeOH     | 2013-06-02 | Dongdianhoucun, Longquanzhen, Kunyuqu, Yantai City, Shandong Province, China                           |
| 30 | <i>Rhamnus erythroxylon</i> Pall.                   | KRIB 0050051 | FBM188-047 | MeOH     | 2013-09-20 | Selenge aimag, Dulaanhaan soum, Delgerkhaan uul, Mongolia                                              |
| 31 | <i>Rhamnus globosa</i> Bunge                        | KRIB 0042549 | FBM166-018 | MeOH     | #N/A       | Gansu Province, China                                                                                  |
| 32 | <i>Rhamnus hainanensis</i> Merr. & Chun             | KRIB 0036872 | FBM122-097 | MeOH     | 2011-03-18 | Kon Tum prov., Kon Plong distr., Mang Canh comm., Vietnam                                              |
| 33 | <i>Rhamnus koraiensis</i> Schneid.                  | KRIB 0050198 | FBM189-007 | MeOH     | 2013-06-04 | Huanshanlu, Longquanzhen, Kunyuqu, Yantai City, Shandong Province, China                               |
| 34 | <i>Rhamnus leptophylla</i> C.K. Schneid.            | #N/A         | FBM071-009 | 95% EtOH | #N/A       | China                                                                                                  |
| 35 | <i>Rhamnus longipes</i> Merr. & Chun                | KRIB 0018920 | FBM046-085 | MeOH     | 2008-06-21 | Bac Kan, Cho Don, Bang Lung, Vietnam                                                                   |
| 36 | <i>Rhamnus napalensis</i> (Wall.) M.A. Lawson       | KRIB 0016963 | FBM030-061 | MeOH     | 2007-12-01 | Lang Son, Huu Lien Reserve, Vietnam                                                                    |
| 37 | <i>Rhamnus oreodendron</i> L.O. Williams            | KRIB 0019642 | FBM040-049 | 95% EtOH | 2008-03-11 | Costa Rica                                                                                             |
| 38 | <i>Rhamnus parvifolia</i> Bunge                     | KRIB 0041050 | FBM148-007 | MeOH     | 2012-05-23 | Eastern Tai, Xiaowutai Mt. Yu Xian, Hebei Province, China                                              |
| 39 | <i>Rhamnus rosthornii</i> Pritz.                    | #N/A         | FBM189-082 | 95% EtOH | #N/A       | China                                                                                                  |
| 40 | <i>Rhamnus sphaerosperma</i> Sw.                    | KRIB 0038090 | FBM140-040 | 95% EtOH | #N/A       | Bosque del Nino. Station surroundings, Grecia Forest Reserve, Cordillera Volcanica Central, Costa Rica |
| 41 | <i>Rhamnus subapetala</i> Merr.                     | KRIB 0039344 | FBM142-012 | MeOH     | 2011-08-11 | Gia Lai prov., Kbang distr., So Pai comm., Vietnam                                                     |
| 42 | <i>Rhamnus utilis</i> Decne.                        | #N/A         | FBM190-013 | 95% EtOH | #N/A       | China                                                                                                  |
| 43 | <i>Sageretia pauciflora</i>                         | KRIB 0062983 | FBM127-030 | 95% EtOH | #N/A       | Yunnan Prov., China                                                                                    |
| 44 | <i>Sageretia thea</i> (Osbeck) M.C. Johnst.         | KRIB 0045154 | FBM145-050 | 95% EtOH | 2011-07-31 | Guangdong liannan, China                                                                               |
| 45 | <i>Scutia eberhardtii</i> Tard.-Blot                | #N/A         | FBM168-080 | MeOH     | #N/A       | Laos                                                                                                   |
| 46 | <i>Scutia myrtina</i> (Burm. f.) Kurz               | KRIB 0016994 | FBM030-064 | MeOH     | 2007-12-01 | Lang Son, Huu Lien Reserve, Vietnam                                                                    |
| 47 | <i>Ventilago calyculata</i> Tul.                    | #N/A         | FBM004-096 | 95% EtOH | #N/A       | China                                                                                                  |
| 48 | <i>Ventilago calyculata</i> var. <i>trichoclada</i> | KRIB 0062082 | FBM070-051 | 95% EtOH | #N/A       | Mengla, Yunnan Prov., China                                                                            |

|    |                                                                        |              |            |          |            |                                                                                                   |
|----|------------------------------------------------------------------------|--------------|------------|----------|------------|---------------------------------------------------------------------------------------------------|
|    | Y.L. Chen & P.K. Chou                                                  |              |            |          |            |                                                                                                   |
| 49 | <i>Ventilago cristata</i> Pierre                                       | KRIB 0032044 | FBM163-032 | MeOH     | 2010-04-17 | Kampong Chhnang province, Roleaba-ear district, Svay Chrom commune, Dambok Kokoh village, Vietnam |
| 50 | <i>Ventilago denticulate</i> Willdenow                                 | KRIB 0029017 | FBM097-016 | MeOH     | #N/A       | Laos                                                                                              |
| 51 | <i>Ventilago inaequilateralis</i> Merr. & Chun                         | #N/A         | FBM063-029 | 95% EtOH | #N/A       | China                                                                                             |
| 52 | <i>Ventilago leiocarpa</i> Benth.                                      | KRIB 0036436 | FBM122-027 | MeOH     | 2011-03-05 | Gia Lai prov., Krong Pa distr., Ia Rbol comm., Vietnam                                            |
| 53 | <i>Ventilago leiocarpa</i> var. <i>pubescens</i> Y.L. Chen & P.K. Chou | KRIB 0061969 | FBM058-049 | 95% EtOH | #N/A       | Mengla, Yunnan Prov., China                                                                       |
| 54 | <i>Ventilago maderaspatana</i> Gaertn.                                 | #N/A         | FBM060-074 | 95% EtOH | #N/A       | China                                                                                             |
| 55 | <i>Ventilago oblongifolia</i> Blume                                    | KRIB 0063851 | FBM127-061 | 95% EtOH | #N/A       | Yunnan Prov., China                                                                               |
| 56 | <i>Ventilago pauciflora</i> Pit.                                       | KRIB 0026610 | FBM076-056 | MeOH     | 2009-03-02 | Lao Cai prov., Van Ban distr., Liem Phu comm., Vietnam                                            |
| 57 | <i>Ziziphus apetala</i> Hook.f.                                        | KRIB 0064121 | FBM007-100 | 95% EtOH | 2006-08-17 | Jinghong, Yunnan Prov., China                                                                     |
| 58 | <i>Ziziphus attopensis</i> Pierre                                      | KRIB 0062056 | FBM085-044 | 95% EtOH | #N/A       | Mengla, Yunnan Prov., China                                                                       |
| 59 | <i>Ziziphus cambodiana</i> Pierre                                      | KRIB 0035058 | FBM114-016 | MeOH     | 2010-08-02 | Ninh Thuan prov., Bac Ai distr., Phuoc Tien comm., Vietnam                                        |
| 60 | <i>Ziziphus funiculosa</i> Buch.-Ham. ex Wall.                         | KRIB 0031771 | FBM109-037 | MeOH     | 2010-01-09 | Binh Phuoc prov., Bu Gia Map distr., Bu Gia Map comm., Vietnam                                    |
| 61 | <i>Ziziphus guatemalensis</i> Hemsl.                                   | KRIB 0043014 | FBM154-064 | 95% EtOH | 2012-03-13 | Guanacaste Conservation Area, Santa Rosa National Park, Costa Rica                                |
| 62 | <i>Ziziphus horsfieldii</i> Miq.                                       | KRIB 0038608 | FBM090-055 | MeOH     | 2009-06-29 | Pangandaran Nature Reserve, West Java, Indonesia                                                  |
| 63 | <i>Ziziphus incurva</i> Roxb.                                          | KRIB 0051035 | FBM198-002 | MeOH     | 2013-09-18 | Makwanpur, Bhimphedi, Suping, Ward-6, Nepal                                                       |
| 64 | <i>Ziziphus mauritiana</i> Lam.                                        | KRIB 0027779 | FBM072-087 | MeOH     | 2009-06-11 | Thanh Hoa prov., Thuong Xuan distr., Van Xuan comm., Vietnam                                      |
| 65 | <i>Ziziphus oenopolia</i> (L.) Mill.                                   | KRIB 0016864 | FBM032-031 | MeOH     | 2007-12-01 | Lang Son, Huu Lien Reserve, Vietnam                                                               |
| 66 | <i>Ziziphus poilane</i> Tardieu                                        | KRIB 0019300 | FBM051-097 | MeOH     | 2008-08-15 | Quang Binh, Quang Ninh, Truong Son, Vietnam                                                       |
| 67 | <i>Ziziphus rotundifolia</i> Lam.                                      | KRIB 0035218 | FBM121-011 | MeOH     | 2010-05-30 | Baluran, Java, Indonesia                                                                          |
| 68 | <i>Ziziphus rugosa</i> Lam.                                            | KRIB 0061514 | FBM053-022 | 95% EtOH | #N/A       | Mengla, Yunnan Prov., China                                                                       |
| 69 | <i>Ziziphus rugosa</i> var. <i>harmandii</i> Pierre                    | KRIB 0048593 | FBM201-085 | MeOH     | 2013-06-03 | Lake 11 Village, Songkhon District(Xebengnouan NBCA), Laos                                        |
| 70 | <i>Ziziphus thyriflora</i> Benth.                                      | KRIB 0052309 | FBM206-061 | MeOH     | 2013-06-03 | Mutile city, Esmeraldas Province, Ecuador                                                         |

<sup>a</sup> Two samples of *Gouania leptostachya* (from different places) were applied for validating the comparative analysis.

**Table S2.** The list of 200 Mass2Motifs extracted from Rhamnaceae dataset.

| Name      | Degree | Features          | Probability <sup>a</sup> | Annotation                                        |
|-----------|--------|-------------------|--------------------------|---------------------------------------------------|
| motif_123 | 82     | fragment_241.0025 | 0.740                    |                                                   |
| motif_163 | 58     | fragment_101.0225 | 0.924                    | Glucosyl moiety                                   |
| motif_120 | 53     | fragment_145.0275 | 0.653                    | Coumaric acid - H <sub>2</sub> O loss             |
|           |        | fragment_119.0525 | 0.054                    |                                                   |
| motif_130 | 51     | fragment_284.0325 | 0.412                    | Kaempferol                                        |
|           |        | fragment_285.0375 | 0.177                    |                                                   |
|           |        | fragment_255.0275 | 0.163                    |                                                   |
| motif_172 | 44     | loss_43.9875      | 0.673                    | CO <sub>2</sub> loss                              |
|           |        | loss_42.9825      | 0.058                    |                                                   |
|           |        | fragment_749.4425 | 0.054                    |                                                   |
| motif_86  | 43     | fragment_300.0275 | 0.509                    | Quercetin related motif                           |
|           |        | fragment_301.0325 | 0.161                    |                                                   |
| motif_153 | 38     | loss_43.9925      | 0.567                    | CO <sub>2</sub> loss                              |
| motif_149 | 35     | fragment_271.0225 | 0.552                    | core flavonol fragments (quercetin and myricetin) |
|           |        | fragment_255.0275 | 0.080                    |                                                   |
| motif_155 | 35     | fragment_113.0225 | 0.802                    |                                                   |
| motif_167 | 31     | fragment_152.0125 | 0.586                    |                                                   |
|           |        | fragment_108.0225 | 0.106                    |                                                   |
|           |        | fragment_109.0275 | 0.055                    |                                                   |
| motif_34  | 30     | loss_162.0525     | 0.666                    | hexose (Glc) loss                                 |
|           |        | fragment_128.0375 | 0.056                    |                                                   |
|           |        | loss_161.0475     | 0.051                    |                                                   |
| motif_87  | 29     | fragment_485.3275 | 0.463                    | (epi)ceanothic acid-related                       |
|           |        | fragment_486.3325 | 0.076                    |                                                   |
|           |        | fragment_486.3275 | 0.062                    |                                                   |
| motif_199 | 27     | fragment_125.0225 | 0.590                    |                                                   |
|           |        | fragment_471.3475 | 0.115                    |                                                   |
| motif_140 | 26     | fragment_151.0025 | 0.602                    |                                                   |
|           |        | fragment_107.0125 | 0.103                    |                                                   |
|           |        | fragment_191.0525 | 0.062                    |                                                   |
|           |        | loss_196.0375     | 0.062                    |                                                   |
| motif_92  | 26     | fragment_161.0475 | 0.601                    |                                                   |
| motif_60  | 25     | loss_62.0025      | 0.617                    | CO <sub>2</sub> /H <sub>2</sub> O loss            |
|           |        | loss_60.9975      | 0.072                    |                                                   |
| motif_148 | 24     | fragment_264.1025 | 0.259                    | Cyclopeptide alkaloids-related                    |
|           |        | fragment_134.0625 | 0.090                    |                                                   |
|           |        | fragment_281.1275 | 0.061                    |                                                   |
|           |        | fragment_189.0675 | 0.056                    |                                                   |

|           |    |                   |       |                                            |
|-----------|----|-------------------|-------|--------------------------------------------|
|           |    | fragment_133.0525 | 0.053 |                                            |
| motif_33  | 24 | fragment_131.0325 | 0.604 | Xyl or Ara moiety                          |
|           |    | fragment_101.0225 | 0.084 |                                            |
| motif_191 | 23 | fragment_167.0325 | 0.377 | vanilloyl-related                          |
|           |    | fragment_134.0375 | 0.123 |                                            |
|           |    | fragment_123.0425 | 0.119 |                                            |
| motif_74  | 23 | fragment_285.0425 | 0.399 |                                            |
| motif_28  | 21 | fragment_163.0375 | 0.39  | coumaric acid-related                      |
|           |    | fragment_255.0275 | 0.147 |                                            |
|           |    | fragment_119.0475 | 0.129 |                                            |
| motif_117 | 20 | fragment_153.0175 | 0.531 | protocatechuoyl-related                    |
|           |    | fragment_109.0275 | 0.062 |                                            |
|           |    | fragment_154.0225 | 0.056 |                                            |
| motif_173 | 20 | loss_18.0125      | 0.449 |                                            |
|           |    | fragment_423.3225 | 0.112 |                                            |
|           |    | fragment_467.3125 | 0.053 |                                            |
| motif_196 | 19 | fragment_161.0425 | 0.432 |                                            |
|           |    | fragment_101.0225 | 0.158 |                                            |
|           |    | fragment_143.0325 | 0.054 |                                            |
| motif_40  | 18 | fragment_269.0425 | 0.388 | Emodin-related                             |
|           |    | fragment_191.0825 | 0.135 |                                            |
|           |    | fragment_112.9825 | 0.078 |                                            |
| motif_66  | 18 | fragment_108.0225 | 0.454 |                                            |
|           |    | fragment_425.3025 | 0.095 |                                            |
| motif_104 | 18 | fragment_285.0375 | 0.319 |                                            |
|           |    | fragment_167.0375 | 0.206 |                                            |
|           |    | fragment_825.4975 | 0.057 |                                            |
| motif_141 | 18 | fragment_269.0475 | 0.403 | Emodin-related                             |
|           |    | fragment_251.0525 | 0.119 |                                            |
| motif_30  | 18 | fragment_101.0275 | 0.430 |                                            |
|           |    | loss_67.9875      | 0.244 |                                            |
|           |    | fragment_191.0325 | 0.079 |                                            |
| motif_179 | 16 | fragment_314.0425 | 0.293 | Rhamnetin (=7-methylquercetin)             |
|           |    | fragment_299.0175 | 0.160 |                                            |
|           |    | fragment_315.0475 | 0.109 |                                            |
|           |    | fragment_315.0525 | 0.086 |                                            |
| motif_171 | 16 | fragment_116.9275 | 0.445 |                                            |
|           |    | fragment_471.3425 | 0.061 |                                            |
|           |    | loss_99.9275      | 0.059 |                                            |
|           |    | fragment_99.9275  | 0.055 |                                            |
| motif_165 | 15 | fragment_423.3275 | 0.394 | ceanothic acid A-ring CO <sub>2</sub> loss |

|           |    |                   |       |                                |
|-----------|----|-------------------|-------|--------------------------------|
|           |    | loss_92.0475      | 0.065 |                                |
| motif_145 | 15 | loss_60.0225      | 0.355 |                                |
|           |    | loss_59.0175      | 0.058 |                                |
| motif_108 | 15 | loss_46.0075      | 0.556 |                                |
| motif_181 | 15 | fragment_131.0375 | 0.348 |                                |
|           |    | fragment_125.0275 | 0.234 |                                |
|           |    | loss_44.0275      | 0.118 |                                |
| motif_64  | 14 | fragment_256.0375 | 0.445 | norrubrofusarin-related        |
|           |    | fragment_117.0175 | 0.078 |                                |
| motif_51  | 14 | fragment_247.1475 | 0.284 | cyclopeptide alkaloids-related |
|           |    | fragment_134.0625 | 0.179 |                                |
| motif_152 | 14 | fragment_241.0025 | 0.144 |                                |
|           |    | fragment_152.9875 | 0.065 |                                |
|           |    | loss_59.0175      | 0.052 |                                |
| motif_128 | 14 | loss_60.0175      | 0.410 |                                |
|           |    | fragment_101.0225 | 0.090 |                                |
|           |    | loss_104.0075     | 0.052 |                                |
| motif_121 | 13 | loss_46.0025      | 0.483 |                                |
|           |    | fragment_255.0325 | 0.218 |                                |
| motif_132 | 13 | fragment_171.1025 | 0.336 |                                |
|           |    | fragment_133.0275 | 0.092 |                                |
|           |    | fragment_300.0325 | 0.075 |                                |
| motif_138 | 13 | fragment_439.3225 | 0.290 |                                |
|           |    | fragment_279.2325 | 0.102 |                                |
| motif_76  | 13 | fragment_124.0175 | 0.393 |                                |
|           |    | fragment_268.0425 | 0.069 |                                |
|           |    | loss_41.1675      | 0.069 |                                |
| motif_88  | 12 | fragment_337.0725 | 0.228 |                                |
|           |    | fragment_217.0125 | 0.072 |                                |
|           |    | fragment_319.0625 | 0.057 |                                |
| motif_3   | 12 | fragment_316.0225 | 0.294 | myricetin-related motif        |
|           |    | fragment_287.0225 | 0.055 |                                |
|           |    | loss_150.0275     | 0.055 |                                |
| motif_134 | 12 | fragment_137.0225 | 0.415 |                                |
|           |    | loss_76.0175      | 0.220 |                                |
| motif_169 | 11 | fragment_163.0425 | 0.342 | coumaric acid related          |
|           |    | fragment_508.2825 | 0.058 |                                |
|           |    | fragment_119.0475 | 0.057 |                                |
| motif_48  | 10 | fragment_247.1425 | 0.202 | cyclopeptide alkaloids-related |
|           |    | fragment_134.0625 | 0.106 |                                |
|           |    | fragment_233.0425 | 0.081 |                                |

|           |    |                   |       |                         |
|-----------|----|-------------------|-------|-------------------------|
| motif_113 | 10 | loss_59.0125      | 0.401 |                         |
|           |    | fragment_161.0275 | 0.089 |                         |
|           |    | fragment_927.4925 | 0.071 |                         |
| motif_133 | 10 | fragment_165.0575 | 0.256 |                         |
|           |    | fragment_150.0325 | 0.117 |                         |
| motif_178 | 10 | fragment_409.3125 | 0.274 |                         |
|           |    | fragment_501.3225 | 0.102 |                         |
|           |    | fragment_471.3125 | 0.051 |                         |
| motif_69  | 9  | fragment_300.9975 | 0.288 |                         |
|           |    | fragment_299.9925 | 0.108 |                         |
|           |    | loss_108.0575     | 0.053 |                         |
| motif_127 | 9  | fragment_179.0575 | 0.241 |                         |
|           |    | fragment_341.1075 | 0.054 |                         |
| motif_164 | 8  | fragment_283.0225 | 0.198 | rhamnocitrin-related    |
|           |    | fragment_298.0475 | 0.114 |                         |
|           |    | fragment_299.0575 | 0.089 |                         |
|           |    | fragment_169.0175 | 0.06  |                         |
|           |    | fragment_210.9875 | 0.052 |                         |
| motif_59  | 8  | fragment_487.3425 | 0.279 |                         |
|           |    | fragment_281.2475 | 0.116 |                         |
|           |    | fragment_839.5125 | 0.100 |                         |
|           |    | fragment_488.3475 | 0.053 |                         |
| motif_101 | 8  | fragment_123.0475 | 0.334 |                         |
|           |    | fragment_111.0475 | 0.154 |                         |
|           |    | fragment_437.3425 | 0.104 |                         |
|           |    | fragment_524.2775 | 0.064 |                         |
| motif_115 | 8  | fragment_113.0275 | 0.392 |                         |
|           |    | fragment_431.0975 | 0.090 |                         |
| motif_44  | 7  | fragment_183.0125 | 0.280 |                         |
|           |    | fragment_165.0225 | 0.205 |                         |
|           |    | fragment_119.0475 | 0.174 |                         |
| motif_109 | 7  | loss_58.0425      | 0.185 | side group (loss based) |
|           |    | loss_30.0475      | 0.111 |                         |
| motif_19  | 6  | fragment_509.3125 | 0.287 |                         |
|           |    | fragment_160.0375 | 0.099 |                         |
| motif_14  | 6  | loss_42.9875      | 0.371 |                         |
|           |    | fragment_134.0575 | 0.205 |                         |
|           |    | fragment_107.0125 | 0.063 |                         |
| motif_67  | 6  | fragment_241.0075 | 0.324 |                         |
|           |    | fragment_301.0025 | 0.185 |                         |
| motif_68  | 6  | fragment_193.0525 | 0.236 |                         |



|           |   |                   |       |
|-----------|---|-------------------|-------|
|           |   | fragment_134.0375 | 0.099 |
|           |   | fragment_395.3325 | 0.084 |
|           |   | loss_118.0275     | 0.077 |
| motif_142 | 6 | fragment_749.4475 | 0.153 |
|           |   | fragment_895.5025 | 0.054 |
|           |   | fragment_225.0575 | 0.054 |
| motif_151 | 6 | fragment_351.1275 | 0.163 |
|           |   | fragment_209.0425 | 0.100 |
|           |   | fragment_205.0725 | 0.079 |
|           |   | fragment_284.0275 | 0.070 |
|           |   | fragment_143.0375 | 0.061 |
|           |   | fragment_127.0425 | 0.060 |
|           |   | fragment_115.0375 | 0.057 |
|           |   | fragment_145.0525 | 0.053 |
| motif_35  | 6 | fragment_165.0525 | 0.213 |
|           |   | loss_146.0575     | 0.064 |
|           |   | fragment_195.0675 | 0.053 |
|           |   | fragment_150.0325 | 0.052 |
|           |   | loss_162.0875     | 0.050 |
| motif_80  | 5 | fragment_121.0275 | 0.288 |
|           |   | fragment_245.0475 | 0.147 |
|           |   | loss_122.0375     | 0.098 |
| motif_85  | 5 | fragment_453.3375 | 0.255 |
|           |   | fragment_199.1325 | 0.070 |
| motif_8   | 5 | fragment_603.3875 | 0.198 |
|           |   | fragment_749.4525 | 0.073 |
| motif_55  | 5 | fragment_271.0625 | 0.284 |
| motif_174 | 5 | fragment_255.2325 | 0.270 |
|           |   | fragment_151.0375 | 0.221 |
|           |   | loss_172.1075     | 0.063 |
| motif_27  | 5 | fragment_251.0575 | 0.117 |
|           |   | fragment_209.0475 | 0.107 |
| motif_112 | 4 | loss_43.0175      | 0.258 |
| motif_62  | 4 | fragment_147.0425 | 0.250 |
|           |   | fragment_183.1025 | 0.059 |
|           |   | loss_112.1225     | 0.059 |
|           |   | loss_124.1275     | 0.054 |
| motif_146 | 4 | fragment_451.3175 | 0.125 |
|           |   | fragment_354.2525 | 0.096 |
|           |   | loss_115.0775     | 0.070 |
|           |   | loss_18.0125      | 0.055 |

|           |   |                   |       |                        |
|-----------|---|-------------------|-------|------------------------|
| motif_182 | 4 | fragment_189.0575 | 0.214 |                        |
|           |   | fragment_765.4475 | 0.163 |                        |
| motif_105 | 4 | fragment_793.4675 | 0.074 |                        |
|           |   | loss_46.0025      | 0.063 |                        |
| motif_119 | 4 | loss_152.0125     | 0.264 |                        |
| motif_90  | 4 | fragment_210.9925 | 0.147 |                        |
|           |   | fragment_152.9875 | 0.128 |                        |
|           |   | fragment_150.9675 | 0.074 |                        |
|           |   | fragment_152.9825 | 0.061 |                        |
|           |   | fragment_845.3975 | 0.060 |                        |
|           |   | fragment_815.3825 | 0.059 |                        |
|           |   | fragment_180.9775 | 0.055 |                        |
| motif_97  | 4 | fragment_457.3325 | 0.236 |                        |
| motif_154 | 4 | fragment_671.3625 | 0.152 |                        |
|           |   | fragment_161.0425 | 0.123 |                        |
|           |   | fragment_509.3125 | 0.054 |                        |
|           |   | fragment_255.0625 | 0.053 |                        |
| motif_156 | 4 | fragment_271.0275 | 0.271 |                        |
|           |   | fragment_144.0675 | 0.064 |                        |
| motif_21  | 4 | loss_167.0325     | 0.106 |                        |
|           |   | fragment_283.0625 | 0.083 |                        |
|           |   | fragment_164.0125 | 0.076 |                        |
| motif_168 | 3 | fragment_245.0825 | 0.231 | torachrysonone-related |
|           |   | loss_64.0175      | 0.114 |                        |
|           |   | fragment_230.0575 | 0.097 |                        |
| motif_110 | 3 | fragment_187.0525 | 0.154 |                        |
|           |   | fragment_225.0075 | 0.131 |                        |
|           |   | fragment_467.3175 | 0.102 |                        |
|           |   | fragment_164.9875 | 0.073 |                        |
| motif_9   | 3 | fragment_242.0225 | 0.078 |                        |
|           |   | loss_71.0125      | 0.063 |                        |
|           |   | fragment_214.0275 | 0.058 |                        |
|           |   | loss_99.0075      | 0.051 |                        |
| motif_7   | 3 | loss_30.0125      | 0.156 |                        |
|           |   | loss_74.0025      | 0.088 |                        |
|           |   | fragment_123.0025 | 0.068 |                        |
|           |   | fragment_172.0475 | 0.068 |                        |
|           |   | fragment_443.3125 | 0.068 |                        |
|           |   | fragment_187.0725 | 0.063 |                        |
| motif_139 | 3 | fragment_125.0225 | 0.155 |                        |
|           |   | fragment_149.0575 | 0.108 |                        |

|           |   |                   |       |
|-----------|---|-------------------|-------|
|           |   | fragment_177.0225 | 0.076 |
|           |   | fragment_259.0575 | 0.067 |
| motif_177 | 3 | fragment_423.3275 | 0.201 |
|           |   | fragment_407.3325 | 0.068 |
|           |   | fragment_424.3325 | 0.054 |
| motif_183 | 3 | fragment_103.9275 | 0.087 |
|           |   | loss_68.1375      | 0.087 |
|           |   | loss_146.0575     | 0.063 |
|           |   | fragment_108.0175 | 0.260 |
| motif_106 | 3 | loss_109.9975     | 0.096 |
|           |   | fragment_259.0975 | 0.059 |
|           |   | fragment_329.0675 | 0.058 |
|           |   | fragment_345.2775 | 0.058 |
| motif_73  | 3 | fragment_100.9325 | 0.122 |
|           |   | fragment_423.2925 | 0.118 |
|           |   | loss_78.0275      | 0.056 |
| motif_84  | 2 | fragment_189.0525 | 0.159 |
|           |   | fragment_300.0225 | 0.065 |
|           |   | fragment_471.3175 | 0.057 |
| motif_89  | 2 | loss_29.0025      | 0.067 |
|           |   | fragment_240.0375 | 0.063 |
| motif_10  | 2 | fragment_469.3275 | 0.097 |
|           |   | loss_136.0525     | 0.051 |
| motif_11  | 2 | fragment_165.0175 | 0.238 |
| motif_63  | 2 | fragment_179.0525 | 0.111 |
|           |   | fragment_139.0375 | 0.083 |
|           |   | fragment_127.0375 | 0.076 |
| motif_65  | 2 | fragment_114.9875 | 0.156 |
|           |   | fragment_181.0575 | 0.088 |
|           |   | fragment_158.9775 | 0.076 |
| motif_0   | 2 | fragment_175.0375 | 0.211 |
|           |   | loss_110.0025     | 0.053 |
| motif_2   | 2 | fragment_138.0325 | 0.175 |
|           |   | fragment_123.0075 | 0.068 |
| motif_50  | 2 | fragment_501.3575 | 0.163 |
|           |   | fragment_779.4575 | 0.058 |
| motif_58  | 2 | loss_43.9825      | 0.206 |
| motif_135 | 2 | fragment_113.0975 | 0.075 |
|           |   | loss_180.1125     | 0.075 |
| motif_42  | 2 | fragment_261.0425 | 0.135 |
|           |   | fragment_291.0525 | 0.084 |

|           |   |                   |       |
|-----------|---|-------------------|-------|
|           |   | fragment_205.0525 | 0.079 |
|           |   | fragment_281.0375 | 0.067 |
| motif_49  | 2 | fragment_335.1475 | 0.164 |
|           |   | loss_44.9975      | 0.130 |
| motif_124 | 2 | loss_163.0625     | 0.172 |
|           |   | fragment_164.0725 | 0.104 |
|           |   | fragment_270.0525 | 0.078 |
| motif_186 | 2 | fragment_275.0575 | 0.131 |
|           |   | fragment_451.3225 | 0.108 |
|           |   | loss_18.0125      | 0.082 |
|           |   | loss_115.0725     | 0.052 |
|           |   | fragment_354.2575 | 0.052 |
| motif_103 | 2 | fragment_179.0325 | 0.257 |
|           |   | fragment_283.2625 | 0.123 |
| motif_100 | 2 | loss_192.0625     | 0.273 |
|           |   | fragment_749.4475 | 0.066 |
| motif_78  | 2 | fragment_152.0075 | 0.227 |
|           |   | fragment_301.0325 | 0.076 |
| motif_197 | 2 | fragment_299.0225 | 0.127 |
|           |   | fragment_441.3375 | 0.170 |
| motif_26  | 2 | fragment_411.3275 | 0.101 |
|           |   | fragment_205.0725 | 0.076 |
|           |   | fragment_347.2525 | 0.076 |
|           |   | fragment_115.0425 | 0.068 |
|           |   | fragment_143.0325 | 0.057 |
|           |   | fragment_127.0375 | 0.056 |
| motif_83  | 1 | loss_84.0225      | 0.087 |
|           |   | fragment_425.3075 | 0.075 |
|           |   | fragment_171.0975 | 0.074 |
|           |   | loss_42.0125      | 0.063 |
| motif_82  | 1 | fragment_99.9275  | 0.097 |
|           |   | loss_158.1325     | 0.062 |
| motif_81  | 1 | fragment_134.0325 | 0.156 |
|           |   | loss_128.1575     | 0.134 |
|           |   | fragment_230.0225 | 0.125 |
|           |   | fragment_245.0425 | 0.119 |
| motif_18  | 1 | loss_45.9975      | 0.207 |
|           |   | fragment_177.0575 | 0.052 |
| motif_12  | 1 | fragment_148.0125 | 0.078 |
| motif_111 | 1 | fragment_183.0425 | 0.052 |
| motif_126 | 1 | fragment_655.3675 | 0.119 |

|           |   |                   |       |
|-----------|---|-------------------|-------|
|           |   | fragment_515.3375 | 0.076 |
| motif_1   | 1 | loss_71.9825      | 0.119 |
|           |   | fragment_171.1225 | 0.063 |
|           |   | loss_122.0925     | 0.063 |
| motif_57  | 1 | loss_166.0275     | 0.096 |
| motif_189 | 1 | fragment_176.9625 | 0.090 |
|           |   | loss_181.2975     | 0.090 |
|           |   | loss_48.0175      | 0.074 |
| motif_46  | 1 | loss_30.0075      | 0.192 |
|           |   | fragment_213.0575 | 0.064 |
| motif_45  | 1 | loss_88.0175      | 0.152 |
|           |   | loss_147.0675     | 0.086 |
|           |   | loss_176.0675     | 0.080 |
|           |   | fragment_227.0325 | 0.068 |
| motif_147 | 1 | fragment_215.0725 | 0.266 |
| motif_144 | 1 | fragment_619.3825 | 0.086 |
|           |   | fragment_353.0675 | 0.071 |
| motif_143 | 1 | fragment_164.9875 | 0.128 |
|           |   | fragment_283.0125 | 0.070 |
|           |   | fragment_216.0375 | 0.063 |
| motif_17  | 1 | loss_134.0525     | 0.094 |
| motif_166 | 1 | loss_146.0375     | 0.219 |
|           |   | fragment_367.1175 | 0.069 |
|           |   | loss_112.2125     | 0.069 |
| motif_176 | 1 | loss_177.0725     | 0.118 |
|           |   | fragment_851.3375 | 0.052 |
| motif_102 | 1 | fragment_109.0275 | 0.181 |
| motif_75  | 1 | fragment_191.0575 | 0.218 |
| motif_72  | 1 | fragment_411.3225 | 0.10  |
|           |   | fragment_529.3525 | 0.10  |
|           |   | loss_192.0525     | 0.054 |
|           |   | fragment_121.0625 | 0.050 |
|           |   | fragment_267.0575 | 0.050 |
|           |   | fragment_269.1125 | 0.050 |
|           |   | fragment_483.3475 | 0.050 |
|           |   | loss_190.1575     | 0.050 |
|           |   | loss_28.0625      | 0.050 |
| motif_194 | 1 | loss_138.0325     | 0.109 |
| motif_195 | 1 | fragment_391.3025 | 0.052 |
| motif_190 | 1 | fragment_469.3325 | 0.212 |
|           |   | fragment_109.0325 | 0.103 |

|           |   |                   |       |
|-----------|---|-------------------|-------|
|           |   | fragment_793.4725 | 0.074 |
| motif_192 | 1 | fragment_162.0275 | 0.077 |
|           |   | fragment_430.0925 | 0.061 |
| motif_36  | 1 | loss_27.9975      | 0.099 |
| motif_38  | 1 | fragment_617.3825 | 0.141 |
|           |   | loss_46.0225      | 0.055 |
| motif_94  | 1 | loss_48.0225      | 0.097 |
|           |   | fragment_393.3175 | 0.054 |
|           |   | fragment_279.2375 | 0.052 |
|           |   | fragment_453.2975 | 0.052 |
| motif_96  | 1 | fragment_149.0225 | 0.236 |
| motif_98  | 1 | loss_178.0825     | 0.193 |
|           |   | fragment_763.4625 | 0.125 |
|           |   | fragment_283.0275 | 0.061 |
| motif_99  | 1 | loss_116.0125     | 0.113 |
|           |   | fragment_109.0675 | 0.056 |
|           |   | fragment_201.1125 | 0.059 |
|           |   | loss_112.1275     | 0.059 |
| motif_161 | 0 | fragment_471.3075 | 0.107 |
|           |   | fragment_135.0825 | 0.055 |
| motif_160 | 0 | loss_176.0325     | 0.095 |
|           |   | loss_78.0325      | 0.061 |
|           |   | fragment_225.0525 | 0.050 |
| motif_162 | 0 | fragment_145.0325 | 0.099 |
|           |   | fragment_150.0575 | 0.066 |
|           |   | fragment_173.0725 | 0.066 |
| motif_13  | 0 | loss_105.9925     | 0.069 |
|           |   | fragment_393.3125 | 0.064 |
|           |   | loss_67.9825      | 0.061 |
|           |   | fragment_309.0775 | 0.058 |
|           |   | fragment_437.3025 | 0.050 |
| motif_61  | 0 |                   |       |
| motif_187 | 0 | fragment_801.4225 | 0.114 |
| motif_122 | 0 | fragment_240.0425 | 0.219 |
|           |   | fragment_240.9975 | 0.208 |
|           |   | fragment_150.9975 | 0.062 |
| motif_4   | 0 | fragment_809.4725 | 0.070 |
|           |   | loss_138.1025     | 0.070 |
|           |   | fragment_225.0025 | 0.054 |
| motif_5   | 0 | fragment_241.0525 | 0.250 |
|           |   | fragment_119.0525 | 0.128 |

|           |   |                   |       |
|-----------|---|-------------------|-------|
|           |   | fragment_135.0475 | 0.053 |
|           |   | loss_61.0175      | 0.053 |
| motif_6   | 0 | fragment_300.0875 | 0.067 |
|           |   | loss_151.2325     | 0.067 |
|           |   | fragment_223.0025 | 0.055 |
| motif_54  | 0 | loss_87.0125      | 0.093 |
|           |   | fragment_116.9325 | 0.055 |
| motif_56  | 0 |                   |       |
| motif_52  | 0 | fragment_161.0225 | 0.230 |
|           |   | fragment_347.2575 | 0.073 |
| motif_53  | 0 | loss_188.0675     | 0.078 |
|           |   | fragment_142.6525 | 0.052 |
|           |   | fragment_697.3775 | 0.052 |
|           |   | fragment_797.5025 | 0.052 |
| motif_131 | 0 | fragment_322.9825 | 0.054 |
| motif_136 | 0 | fragment_162.8425 | 0.064 |
|           |   | loss_188.1025     | 0.140 |
| motif_137 | 0 | fragment_112.9875 | 0.164 |
|           |   | fragment_487.3475 | 0.056 |
| motif_47  | 0 | fragment_277.2175 | 0.251 |
|           |   | fragment_264.0925 | 0.069 |
| motif_43  | 0 | fragment_293.0425 | 0.072 |
|           |   | fragment_135.0475 | 0.061 |
| motif_41  | 0 | fragment_391.3025 | 0.069 |
|           |   | fragment_259.0625 | 0.067 |
| motif_15  | 0 | fragment_451.2825 | 0.093 |
|           |   | loss_180.0425     | 0.090 |
|           |   | fragment_295.2225 | 0.058 |
| motif_16  | 0 | fragment_257.0425 | 0.219 |
|           |   | fragment_453.3025 | 0.124 |
|           |   | fragment_281.2525 | 0.074 |
| motif_175 | 0 |                   |       |
| motif_170 | 0 | fragment_164.0475 | 0.264 |
|           |   | fragment_271.0575 | 0.173 |
|           |   | fragment_537.3425 | 0.051 |
| motif_125 | 0 | loss_87.9775      | 0.109 |
|           |   | fragment_279.2275 | 0.057 |
|           |   | loss_178.0275     | 0.057 |
| motif_180 | 0 | fragment_151.0075 | 0.123 |
|           |   | fragment_175.0425 | 0.082 |
|           |   | fragment_337.3475 | 0.063 |

|           |   |                   |       |
|-----------|---|-------------------|-------|
| motif_158 | 0 | fragment_151.0425 | 0.151 |
|           |   | fragment_133.0575 | 0.079 |
|           |   | fragment_149.0625 | 0.058 |
| motif_185 | 0 | fragment_241.0475 | 0.173 |
| motif_184 | 0 | fragment_193.0475 | 0.131 |
|           |   | fragment_185.1225 | 0.072 |
|           |   | fragment_187.0375 | 0.072 |
|           |   | loss_106.0725     | 0.072 |
|           |   | fragment_159.0325 | 0.063 |
| motif_159 | 0 | loss_18.0075      | 0.154 |
|           |   | fragment_469.2975 | 0.065 |
| motif_188 | 0 | fragment_215.0325 | 0.250 |
|           |   | loss_43.9975      | 0.085 |
|           |   | fragment_264.0975 | 0.072 |
| motif_129 | 0 |                   |       |
| motif_107 | 0 |                   |       |
| motif_79  | 0 | loss_162.0325     | 0.088 |
|           |   | fragment_273.1475 | 0.065 |
| motif_77  | 0 | loss_87.0075      | 0.186 |
|           |   | fragment_483.3125 | 0.137 |
| motif_70  | 0 | fragment_499.3025 | 0.077 |
| motif_71  | 0 | fragment_255.2275 | 0.174 |
|           |   | fragment_149.0275 | 0.101 |
| motif_150 | 0 | fragment_499.3425 | 0.197 |
|           |   | fragment_413.3425 | 0.057 |
|           |   | fragment_118.9625 | 0.056 |
|           |   | loss_55.9925      | 0.056 |
|           |   | fragment_500.3475 | 0.055 |
| motif_193 | 0 | fragment_329.0275 | 0.077 |
|           |   | loss_62.0075      | 0.065 |
|           |   | fragment_345.0625 | 0.055 |
|           |   | fragment_344.0525 | 0.053 |
| motif_198 | 0 | fragment_192.0075 | 0.136 |
|           |   | fragment_193.0125 | 0.069 |
|           |   | fragment_359.1125 | 0.054 |
| motif_118 | 0 | loss_148.0375     | 0.114 |
|           |   | fragment_153.0225 | 0.093 |
|           |   | fragment_205.0525 | 0.072 |
|           |   | fragment_378.2475 | 0.058 |
|           |   | loss_171.0975     | 0.058 |
| motif_114 | 0 | fragment_121.0325 | 0.103 |



|           |   |                   |       |
|-----------|---|-------------------|-------|
|           |   | fragment_197.0475 | 0.064 |
|           |   | loss_156.1125     | 0.064 |
| motif_116 | 0 | fragment_501.3175 | 0.126 |
|           |   | fragment_293.0475 | 0.091 |
| motif_32  | 0 | loss_73.0275      | 0.070 |
| motif_31  | 0 | fragment_183.0325 | 0.134 |
|           |   | loss_140.0325     | 0.058 |
| motif_37  | 0 | fragment_137.0275 | 0.236 |
| motif_39  | 0 | fragment_455.3525 | 0.088 |
| motif_91  | 0 | fragment_181.0525 | 0.132 |
|           |   | fragment_373.0425 | 0.114 |
|           |   | loss_163.0575     | 0.085 |
|           |   | fragment_417.1575 | 0.070 |
| motif_93  | 0 |                   |       |
| motif_95  | 0 | fragment_111.0075 | 0.109 |
|           |   | fragment_423.3325 | 0.063 |
| motif_157 | 0 | fragment_181.0475 | 0.110 |
|           |   | fragment_264.1075 | 0.098 |
|           |   | fragment_765.4425 | 0.094 |
|           |   | fragment_337.0675 | 0.068 |
| motif_25  | 0 | fragment_647.4175 | 0.084 |
|           |   | loss_163.2075     | 0.067 |
| motif_24  | 0 | loss_136.0175     | 0.071 |
| motif_20  | 0 | fragment_469.2925 | 0.111 |
|           |   | fragment_255.0675 | 0.088 |
| motif_23  | 0 | loss_177.0775     | 0.170 |
|           |   | fragment_177.0175 | 0.102 |
|           |   | fragment_160.0425 | 0.099 |
| motif_22  | 0 | fragment_155.1075 | 0.068 |
|           |   | fragment_781.4375 | 0.068 |
| motif_29  | 0 | fragment_135.0425 | 0.159 |
|           |   | loss_178.0475     | 0.140 |
|           |   | fragment_207.0875 | 0.064 |

---

<sup>a</sup> Only MS/MS features which can be explained by any inferred Mass2Motif with probability > 0.05 are shown in this table.

## Supplementary References

- Fabre, N., Rustan, I., de Hoffmann, E. and Quetin-Leclercq, J.** (2001) Determination of flavone, flavonol, and flavanone aglycones by negative ion liquid chromatography electrospray ion trap mass spectrometry. *J. Am. Soc. Mass Spectrom.* **12**, 707–715.
- Kang, K. B., Kim, J. W., Oh, W. K., Kim, J. and Sung, S. H.** (2016) Cytotoxic ceanothane- and lupane-type triterpenoids from the roots of *Ziziphus jujuba*. *J. Nat. Prod.* **79**, 2364–2375.
- Kim, S. H., Jang, S. D., Lee, K. Y., Sung, S. H. and Kim, Y. C.** (2009a) Chemical constituents isolated from *Polygala japonica* leaves and their inhibitory effect on nitric oxide production *in vitro*. *J. Enz. Inh. Med. Chem.* **24**, 230–233.
- Kim, S. H., Choi, E. J., Lee, M. K., Lee, K. Y., Park, J. H., Kim, Y. C., and Sung, S. H.** (2009b) Simultaneous determination of five active constituents in the aerial parts of *Saururus chinensis* by HPLC–DAD. *J. Liq. Chromatogr. Relat. Technol.* **32**, 2943–2953.
- Sung, S. H.** (1998) Hepatoprotective lignans of *Saururus chinensis*. Ph.D. thesis, Seoul National University.
- Tuenter, E., Exarchou, V., Apers, S. and Pieters, L.** (2017a) Cyclopeptide alkaloids. *Phytochem. Rev.* **16**, 623–637.
- Tuenter, E., Segers, K., Kang, K. B., Viaene, J., Sung, S. H., Cos, P., Maes, L., Heyden, Y. V. and Pieters, L.** (2017b) Antiplasmodial activity, cytotoxicity and structure-activity relationship study of cyclopeptide alkaloids. *Molecules* **22**, (2017).
- Yoo, G., Park, S. J., Lee, T. H., Yang, H., Baek, Y. S., Kim, N., Kim, Y. J. and Kim, S. H.** (2015) Flavonoids isolated from *Lespedeza cuneata* G. Don and their inhibitory effects on nitric oxide production in lipopolysaccharide-stimulated BV-2 microglia cells. *Pharmacogn. Mag.* **11**, 651–656.
